# Supplementary material
Source: PubMed Central journal article supplement (PMC3945097)
Supplement: mmc2.pdf [file mmc2.pdf]

# Kinetics of Fast Changing Intramolecular Distance Distributions Obtained by Combined Analysis of FRET Efficiency Kinetics and Time-Resolved FRET Equilibrium Measurements

E. Lerner, T. Orevi, E. Ben Ishay, D. Amir, and E. Haas\*

The Mina and Everard Goodman Faculty of Life Sciences, Bar Ilan University, Ramat Gan, Israel 52900

**ABSTRACT** Detailed studies of the mechanisms of macromolecular conformational transitions such as protein folding are enhanced by analysis of changes of distributions for intramolecular distances during the transitions. Time-resolved Förster resonance energy transfer (FRET) measurements yield such data, but the more readily available kinetics of mean FRET efficiency changes cannot be analyzed in terms of changes in distances because of the sixth-power dependence on the mean distance. To enhance the information obtained from mean FRET efficiency kinetics, we combined the analyses of FRET efficiency kinetics and equilibrium trFRET experiments. The joint analysis enabled determination of transient distance distributions along the folding reaction both in cases where a two-state transition is valid and in some cases consisting of a three-state scenario. The procedure and its limits were tested by simulations. Experimental data obtained from stopped-flow measurements of the refolding of *Escherichia coli* adenylate kinase were analyzed. The distance distributions between three double-labeled mutants, in the collapsed transient state, were determined and compared to those obtained experimentally using the double-kinetics technique. The proposed method effectively provides information on distance distributions of kinetically accessed intermediates of fast conformational transitions induced by common relaxation methods.

## INTRODUCTION

Inter- and intramolecular distance determination by means of Förster resonance energy transfer (FRET) measurements is an ideal source of information on fast conformational transitions in biopolymers such as protein folding (1–6) or protein ligand interactions (1,7–14). The common mode of measurement of macromolecular conformational transitions, by determination of the time dependence of the mean transfer efficiency between the probes can yield the mean distance between the probes only in ensembles where all molecules share similar distances. However, in ensembles of multiple conformers, where an intramolecular distance should be characterized by a distribution of distances, the mean transfer efficiency has no relationship to any type of mean distance. This limitation is due to the sixth-power dependence of the transfer efficiency on the interprobe distance (13,15–17). The actual mean distances between the probes can be obtained by time-resolved FRET (trFRET) experiments where distance distributions and their fast fluctuations can readily be determined (15,18). The double-kinetics methods (14,19–23) enable fast acquisition of the trFRET data at different time points along a kinetic track. Using this method, the transient ensemble of conformers can be characterized in terms of their transient distributions of intramolecular distances (12,24). The transitions between them produce a superposition of the distributions of that intramolecular distance (16,25), weighted by the fraction of each subpopulation of conformers (initial and

final in the case of a two-state transition) at each time point, which is dictated by the transition rate constants.

These experiments are not always possible, mainly due to limitations of sample quantities, as well as expensive instrumentation. However, in many cases the intramolecular distance distribution of a fast changing ensemble of conformers at the initial phases of the transition and throughout the duration of the transition can be obtained even though only mean transfer efficiency is measured. This can be achieved by joint analysis of time-dependent mean transfer efficiency values obtained during the time course of an induced conformational change (e.g., a protein folding transition) and trFRET data obtained at the end states of the transition (e.g., the unfolded and fully folded protein ensembles).

In many relaxation experiments, in which a conformational transition is induced by fast change of conditions, an initial state is formed immediately after relaxation of the perturbation. The characteristics of the ensemble of macromolecules thus formed are of much interest because they represent the actual initial ensemble from which the conformational relaxation starts. This ensemble, in most cases, is different from the pretransition equilibrium ensemble, which is under chemical or physical perturbation (2,6,8,14,24,26,27). Typical examples are found in protein refolding kinetic experiments, where folding is induced by fast removal of the perturbation that induces unfolding (e.g., change of solvent from high concentrations of denaturants to a physiological solution), which initiates a very fast initial adaptation to the perturbation-free conditions (folding conditions), followed by a slower transition to the ensemble of folded conformers (5,6,22).

Submitted July 25, 2013, and accepted for publication November 5, 2013.

\*Correspondence: elisha.haas@biu.ac.il

Editor: Ashok Deniz.

© 2014 by the Biophysical Society  
0006-3495/14/02/0667/10 \$2.00

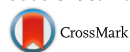

Practically, in most experiments, the initial phase is too fast to be detected by stopped-flow experiments (28) and data acquisition follows the slower transition between the initial and folded states. Thus the question of the characteristics of ensembles of unfolded protein molecules under folding conditions, i.e., at the starting point of the folding transition, as well as the transition progresses, is of great interest but difficult to measure. That was our motivation for developing a method to determine the distance distribution between two FRET probes located at sites of interest in a protein molecule immediately after the removal of the unfolding perturbation (~1 ms). The method is based on combined analysis of mean FRET efficiency kinetic traces together with trFRET data obtained at the end of the refolding transition once equilibrium is reached under folding conditions.

This analysis yields the intramolecular distance distribution at the initiation and also in the two-state case during the refolding transition. In the case of a two-state transition, this believed-new method yields the relative fractions of the initial and final conformers at each stage of the transition, avoiding the need for a double-kinetics experiment. The method was tested by simulation and applied experimentally in a study of the mechanism of refolding of *Escherichia coli* adenylate kinase (AK). Three structural elements in the CORE domain of the AK molecule (PDB:4AKE (29)) were examined: a  $\beta$ -strand element (residues 79–86), a loop-forming element (residues 28–71) (22,24), and two residues (residues 18 and 203) (22,24) which are in close proximity in the folded state. The initial state distance distributions, obtained from model fitting, were compared to those obtained experimentally using the double-kinetics FRET technique.

## MATERIALS AND METHODS

### Protein preparation and labeling

*Escherichia coli* AK mutants were constructed by site-directed mutagenesis, overexpressed, and purified as described in the literature (22,24,30). All variants were derived from the Cys-free C77S pseudo-AK form. In each labeled AK mutant, the donor, Trp, was genetically inserted at a predefined position. In addition, a single Cys was genetically inserted at the desired acceptor positions. The Donor Only (DO) variant was prepared by Cys blockage by reaction with iodoacetamide (Sigma, St. Louis, MO). The Donor in the presence of Acceptor (DA) variants were labeled by reaction with 7-iodoacetamidocoumarin-4-carboxylic acid (Cou) or 5-aminosalicylic acid (Sal). Labeling and purification procedures were described previously in Sinev et al. (31) and Jacob et al. (32).

### Spectroscopic measurements

Steady-state fluorescence kinetic measurements were performed by a stopped-flow SFM 400 (Bio-Logic, Claix, France) as reported previously in Ben Ishay et al. (22). The bandpass filter (Cat. No. 357/44; Semrock, Rochester, NY), which was used for selection of the tryptophan emission, efficiently blocks the acceptor emissions. Refolding experiments were performed by a two-step dilution (double jump) to minimize the effect of

proline isomerization on the rate of refolding (24). Measurements were carried out using the  $\mu$ FC-08 cell (Bio-Logic), with a 1-ms dead-time.

The system used for the fluorescence kinetic measurements in time-resolved mode, double-kinetics, was described recently in Ben Ishay et al. (23), and the measurement protocols were reported previously in Ben Ishay et al. (22).

Equilibrium time-resolved fluorescence measurements were performed as described previously in Ben Ishay et al. (22) and Orevi et al. (24). Equilibrium intramolecular distance distributions (IDDs) were calculated from the best-fit results of the Haas-Steinberg model (33,34) to the DO and DA donor fluorescence decays. Possible errors due to photochemistry of the probes were absent due to the short time intervals of data collection. No changes of emission intensity were detected after test irradiation at the excitation wavelengths with duration 10 times longer than the average data collection times.

## Model implementation

Two independent data sets were used. The first was the trace of kinetics of change for transfer efficiencies obtained by the stopped-flow experiment where the emission intensity of the donor was monitored in the absence and presence of an acceptor. The second data set was the parameters of the distribution for the intramolecular distance between the donor and the acceptor in the folded state at the end of the refolding transition. A rate constant for the kinetics of change of the transfer efficiency was obtained by fitting a theoretical trace of the kinetics of the change for the transfer efficiency to the experimental one obtained in the refolding experiment. The free parameters in this fitting procedure were the parameters of the distribution of the labeled intramolecular distance in the collapsed subpopulation and the ratio of the population ratios. The constraints used in this analysis were the two (at times three) subpopulations that were included in the model (where one is known and the other unknown), and the known parameters of the distance distribution of the final (folded) subpopulation.

The fitting procedure searched for a combination of the free parameters that would yield a time-dependent theoretical transfer efficiency trace, based on integration of the contribution of the two subpopulations best fitted to the experimental trace. The analysis was implemented in the software MATLAB Ver. R2008b (The MathWorks, Natick, MA). All model fittings performed, whether on simulated or experimental data, were achieved by use of the *lsqcurvefit* function for nonlinear least-squares curve fitting using the Levenberg-Marquardt algorithm. The final distance distribution parameters were calculated by analysis of trFRET experiments performed under equilibrium, at the end of the refolding transition. The analysis is based on fitting the donor fluorescence decays in the absence and presence of acceptor to corresponding decay curves created using the Haas-Steinberg model implemented in FORTRAN (33,35). The nonexponential nature of the donor fluorescence decay and its possible effect on the Förster constant were taken into account as described earlier in Orevi et al. (35) and Haran et al. (36). According to the best-fit  $\chi$ -square values, a 95% confidence interval was calculated and used to determine model parameter error ranges in a rigorous error analysis process, in which the model's parameter range was fixed at different values around the best-fit result.

## RESULTS

### Theory

#### *Two-state process*

Consider a first-order, two-state nonequilibrium kinetic process, e.g., folding of a protein from the initial state which we shall call the “collapsed state” (*C*) (unfolded under folding conditions), to its native folded state (*F*),  $C \rightarrow F$ , with a rate constant,  $k_f$ , while neglecting the minor effect of the slow

reverse reaction under the given conditions. Assuming that at time zero, only state  $C$  is occupied, the rate equation for the change of the fraction of the folded state occupancy,  $f(t)$ , is given as

$$f(t) = 1 - e^{-k_F t}. \quad (1)$$

The ensemble of each state,  $C$  and  $F$ , can be characterized by an IDD,  $P_C(r,t)$  and  $P_F(r,t)$ , respectively. For a solution that contains both ensembles,  $F$  and  $C$ , one can calculate the overall transient IDD,  $P(r,t)$ , as a superposition of the two ensembles weighted by the fraction of the two subpopulations, as

$$P(r,t) = f(t)P_F(r) + [1 - f(t)]P_C(r). \quad (2)$$

The time dependence of the mean energy transfer efficiency (ETE) obtained for that solution during the transition is given by the Förster relation, weighted by the relative contribution of the transient two component IDDs of Eq. 2 (18), as

$$\langle E \rangle(t) = \int_{r_{\min}}^{r_{\max}} \frac{P(r,t)}{1 + [r/R_0(t)]^6} dr, \quad (3)$$

where  $R_0(t)$  is the Förster critical distance at different time points along the kinetics, and  $r_{\min}$  and  $r_{\max}$  are distance boundaries. The IDDs can be modeled as three-dimensional radial distributions,

$$p_i(r) = \text{Norm} \cdot r^2 e^{-b_i(r-a_i)^2},$$

having  $i \in \{C, F\}$ , where  $b_i$  and  $a_i$  are parameters related to the mean distance and to the reciprocal of the width of the distribution of ensemble  $i$ , respectively, and  $\text{Norm}$  is a normalization parameter.

Assuming that  $R_0(t)$  stays constant during the time course of the transition, substitution of Eqs. 1 and 2 into Eq. 3 yields the time dependence of the mean ETE during the transition, as

$$\begin{aligned} \langle E \rangle(t) = & (1 - e^{-k_F t}) \int_{r_{\min}}^{r_{\max}} \frac{[P_F(r) - P_C(r)] dr}{1 + (r/R_0)^6} \\ & + \int_{r_{\min}}^{r_{\max}} \frac{P_C(r) dr}{1 + (r/R_0)^6}, \end{aligned} \quad (4)$$

which is now reduced to a monoexponential function of time.

The refolding rate constant,  $k_F$ , can be obtained by a curve-fitting procedure using the experimental ETE,  $\langle E \rangle(t)$ . The quality of fit is judged by statistical tests (9,37). To determine the unknown distribution of the dis-

tance in the collapsed state,  $P_C(r)$ , one can use Eq. 4 and the following independent data:

1. The value  $k_F$  obtained by fitting the  $\langle E \rangle(t)$  trace; and
2. The distance distribution obtained for the ensemble of folded molecules by trFRET,  $P_F(r)$ .

Then, a fitting procedure can be applied for determination of the collapsed state distribution by fitting the kinetics of the mean transfer efficiency and using the folded state distribution  $P_F(r)$  as constants in the model.

There are two additional phenomena that might affect the FRET parameters and should be considered when analyzing FRET experiments: 1), possible time dependence of  $R_0$  due to changes of spectral properties of the probes (e.g., due to changes of local environments in the conformers) (15); and 2), enhancement of the transfer efficiency by fast conformational fluctuations (15,38). Moreover, significant deviation of the transfer efficiency kinetics,  $\langle E \rangle(t)$ , from an exponential shape might indicate a possible underlying three-state transition (9). Simulations of FRET kinetics including these possible effects were performed to test the applicability and validity of the proposed model.

## Assessment of the applicability of the method and its limits

### Simulation of two-state transitions

Simulation of a transition from a collapsed to a folded ensemble of conformers represented by the corresponding intramolecular distance distributions was performed. The kinetics of the change of the mean transfer efficiency was calculated using the parameters of the simulated distributions and the predetermined value of  $k_F$ . The simulated  $P_C(r)$  was recovered assuming the two-state model using the values of  $P_F(r)$  and  $k_F$  by means of Eq. 4. The simulation setup is explained in the [Supporting Material](#) and the results are reported in Spreadsheet S1 in the [Supporting Material](#).

The analyses of the simulated experiments show the limits of applicability of the combined approach for obtaining significant values of the distribution,  $P_C(r)$ :

1. The greater the distance difference between the means of the two distance distributions ( $P_C(r)$  and  $P_F(r)$ ), the narrower the fitting error ranges.
2. The method is effective when the change of the transfer efficiency is within the range of 0.1 and 0.9.
3. The range of overall change in the transfer efficiency during the full transition should be at least five times higher than the standard deviation of the experimental noise on the FRET scale.
4. The mean of the distance distributions of both the collapsed and folded ensembles should be in the range determined by the Förster critical distance ( $0.5 R_0 < r < 1.5 R_0$ ).

- The fitting error range of the calculated parameters of the distribution  $P_C(r)$  is reduced for distributions with higher full width at half-maximum (FWHM) whenever their mean distance is larger than that of the known distribution  $P_F(r)$ . The fitting error range for the calculated parameters is smaller for the case of distribution with smaller FWHM, when the mean of  $P_C(r)$  is smaller than that of  $P_F(r)$ .
- Selection of pairs of probes with known  $R_0$  values whose range covers the mean of both  $P_F(r)$  and  $P_C(r)$ , ( $0.5 R_0 < r_{\text{mean}} < 1.5 R_0$ ), can be difficult when the mean of the range of possible values of the mean  $P_C(r)$  is unknown. In that case, the classic experimental FRET strategy of repeating experiments with more than one pair of probes can be very helpful.

#### Effect of various deviations from two-state transition on analysis using Eq. 4

We tested the effect of various variables on the quality of fit of the time-dependent mean transfer efficiency trace  $\langle E \rangle(t)$  to a monoexponential function of the type

$$\langle E \rangle(t) = ne^{-kt} + m. \quad (5)$$

We tested the limits of fitting a monoexponential function to  $\langle E \rangle(t)$  traces produced by simulation of experiments where deviations from a two-state transition are possible, and studied the performance of fitting to the resulting simulated traces (see the [Supporting Material](#) and Spreadsheet S1 in the [Supporting Material](#)).

For the dataset chosen for simulations, the conclusions of these simulations are as follows.

- In the case of a simulated three-state transition, modeled by Eqs. S1–S4 in the [Supporting Material](#), the  $\langle E \rangle(t)$  trace can be fitted to a monoexponential function (pseudo two-state case) under two different scenarios, here given.
  - The rate of formation of the intermediate conformers and of their transition to the folded conformers is similar (standard error of  $k_i < 10\%$ ), and its mean distance is between those of the initial and folded ensembles, and
  - The intramolecular distance distribution of the intermediate ensemble is similar to the distributions of the collapsed or the folded states. A three-state transition in which the characteristics of the distribution of the measured intramolecular distances differ from the above scenarios would yield an acceptable fit of the  $\langle E \rangle(t)$  trace to the monoexponential model, and Eq. 4 would not be applicable.
- In the case of a two-state transition with distribution of rate constants where the variation is within one order of magnitude, an acceptable fit to a monoexponential  $\langle E \rangle(t)$  curve would be obtained.

- Unimodal (one-state) (39–41) FRET kinetics cannot be fitted to a monoexponential model (see Fig. S1 in the [Supporting Material](#)).
- The effect of dependence of the  $R_0$  values on the change of conformations during a two-state transition is small and does not preclude application of Eq. 4.
- The effect of high intramolecular flexibility (interprobe diffusion coefficient of up to  $20 \text{ \AA}^2/\text{ns}$ ) (15) in the collapsed state conformers is within the uncertainty range of the analysis based on Eqs. 3 and 4.

#### Experimental evaluation of the method—collapsed state conformations of AK

The method was applied in a study focused on the refolding of three different double-labeled segments in AK (each having a single donor and a single acceptor at the specified positions). The labeled AK mutants had a Trp as donor at residues 86, 71, or 203 and either a coumarin (Cou) derivative or a salicylic acid derivative (Sal) as acceptors of FRET at residues 79, 28, or 18, respectively, as described in the [Materials and Methods](#) (22,24). The labeled AK mutants were denatured by fast mixing into a final Guanidinium Hydrochloride (GndHCl) concentration of 1.8 M; after 3 s, the denaturant was diluted to a final concentration of 0.3 M GndHCl, in a stopped-flow experiment, as described by Orevi et al. (24).

The measured segments of AK represent the following structures in the AK folded state (PDB:4AKE (29)): residues 79 and 86 are at the two ends of a  $\beta$ -strand element; 28 and 71 are at the node of a fast closing loop (24); and 18 and 203 are two spatially proximate residues in the CORE domain (Fig. 1). The  $R_0$  values at 0.3 M GndHCl of the pair 79–86 with Trp as a donor and Sal or Cou as acceptor were 18.1 and 23.9  $\text{\AA}$ , respectively, and the values of the pairs

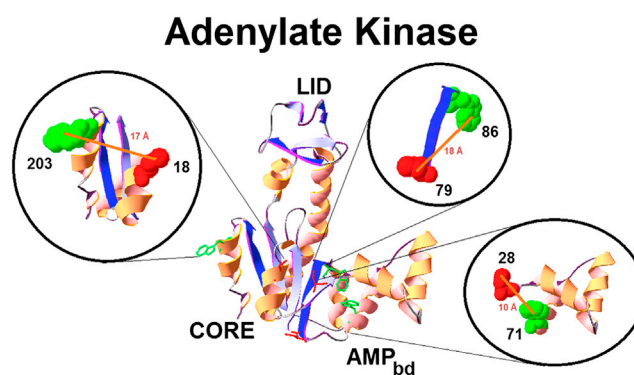

FIGURE 1 The crystal structure of *E. coli* adenylate kinase and three pairs of sites that were labeled to test the experimental method. (Circles each represent one double-labeled mutant, in which the donor Trp residue is represented by a green space-filling structure and the Cys residue, the site for attachment of the acceptor, is represented by a red space-filling structure.) Expected mean distance between the labeled sites in the folded state (as represented by orange lines connecting to site centers). To see this figure in color, go online.

28–71 and 18–203 labeled with Trp and Sal were 17.2 and 15.9 Å, respectively. The folded state intramolecular distance distributions,  $P_F(r)$ , between the ends of the labeled segments were obtained by trFRET measurements performed at equilibrium under final solution conditions used in the stopped-flow experiment (0.3 M GndHCl) (12,16,17,24) (Fig. 2 D, black trace, and Table 1). The distributions were also determined for the labeled mutants in 1.8 M GndHCl (unfolded state) (Fig. 2 D, magenta trace, and Table 1). These results are based on the best fit to the donor fluorescence decays at equilibrium (Fig. 3) (15,33).

We then performed fluorescence emission intensity-detected stopped-flow measurements of the mutant labeled by the donor without an acceptor (the DO mutant) (Fig. 2 A, black), and of the mutant labeled by both the donor and the acceptor (the DA mutant) (Fig. 2, A, red trace). For experiments in which the intensity of the donor significantly changed over the course of DO mutant refolding, a Förster critical distance time vector,  $R_0(t)$  (Fig. 2 B), was prepared using Eq. S5 in the Supporting Material. The experimental  $\langle E \rangle(t)$  traces were calculated using Eqs. S6 and S7 in the Supporting Material, and fitted to the theoretical trace using Eq. 3. The values of  $\langle E \rangle(\infty)$  (i.e., at the end of the transition)

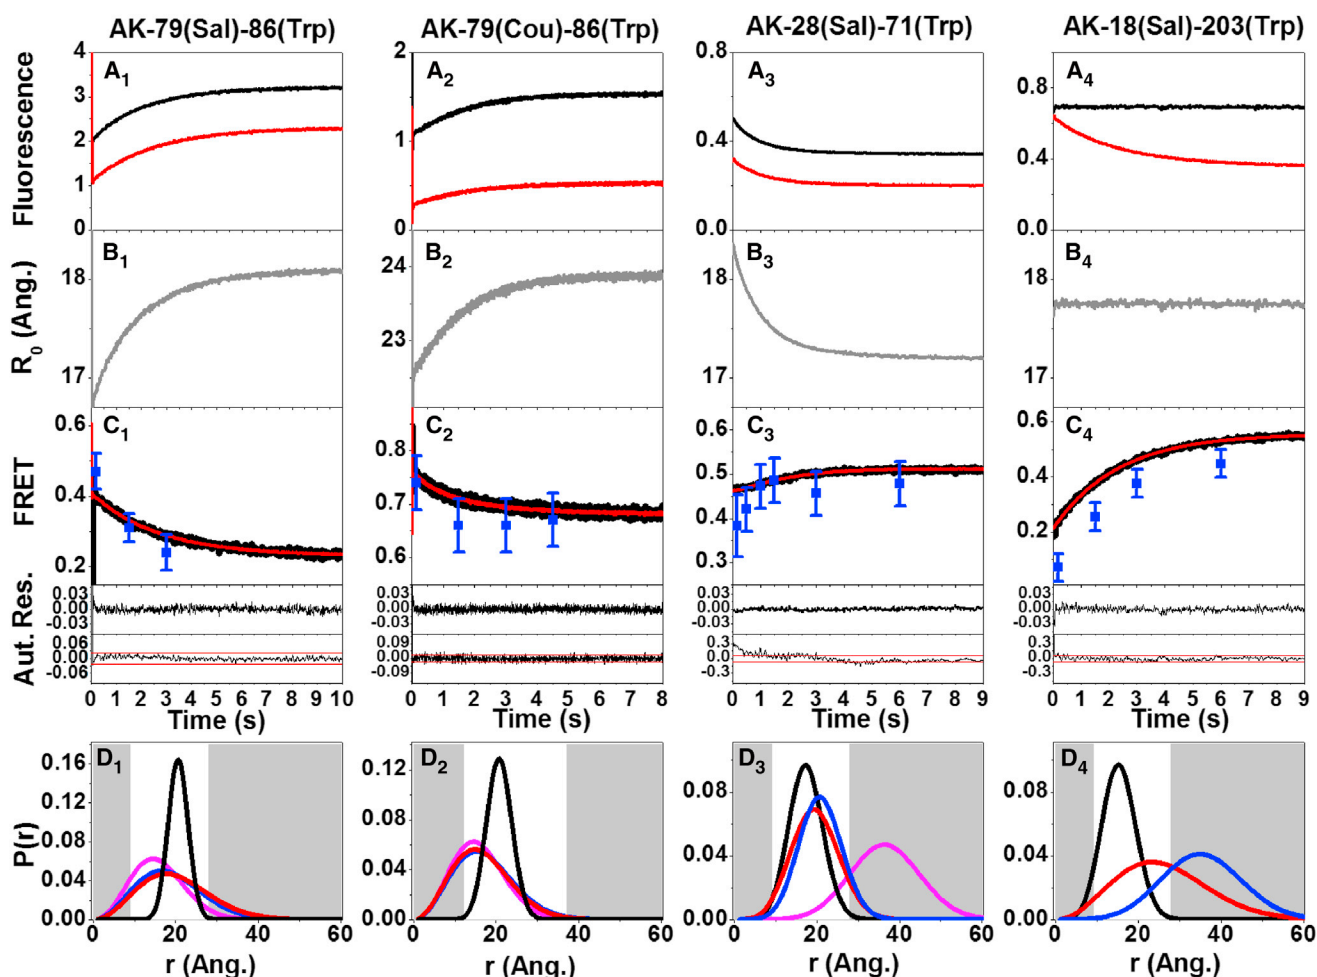

FIGURE 2 Emission intensity detected FRET efficiency kinetics during the refolding of *E. coli* AK mutants initiated by rapid mixing in stopped-flow experiment and the corresponding intramolecular distance distributions determined by the combined analysis. The kinetics of the change of the emission intensity of the donor in the absence (black) and presence (red) of an acceptor is presented in the top row (A). The resulting time dependence of the Förster critical distance ( $R_0$ ; see the Supporting Material) is shown in the second row (B); experimental traces of the kinetics of change of FRET efficiencies were obtained based on the data presented in panels A and B, and are shown in the third row (C, in black; also see the Supporting Material). The residuals of the fitting (Res.) of the kinetic trace (C) with that obtained by the combined analysis of Eqs. 3 and 4 and the autocorrelation of the residuals of fitting (Aut.) are shown in the bottom panels of row C (red lines are lower and upper bounds of 95% statistical significance of the autocorrelation of the residuals). Mean transfer efficiency obtained from the double-kinetics trFRET experiments at selected time points during the refolding kinetics (shown by the blue squares in panel C). The corresponding calculated intramolecular distance distributions are shown in the last row (D) for the following states: the initial (collapsed) state obtained by the combined analysis of data shown in panel C (red); by the experimental double-kinetics experiment (blue); the folded state (black); and the denatured state, analyzed by equilibrium trFRET experiment (magenta). To see this figure in color, go online.

**TABLE 1** Comparison of parameters of distributions for three intramolecular distances in the *Escherichia coli* AK molecule

| AK mutant <sup>a</sup> | $P_F(r)^b$            |                       | $P_C(r)$ double-kinetics <sup>c</sup> |            | $P_C(r)$ intensity <sup>d</sup> |            | $k_F$ (s <sup>-1</sup> ) <sup>e</sup> |
|------------------------|-----------------------|-----------------------|---------------------------------------|------------|---------------------------------|------------|---------------------------------------|
|                        | Peak (Å) <sup>e</sup> | FWHM (Å) <sup>f</sup> | Peak (Å)                              | FWHM (Å)   | Peak (Å)                        | FWHM (Å)   |                                       |
| 79(Sal)-86(Trp)        | 20.7 (20.0–20.9)      | 6 (4–8)               | 16.6 (16.1–20.5)                      | 19 (5–20)  | 17.8 (17.7–18.7)                | 20 (12–21) | 0.40 (0.31–0.47)                      |
| 79(Cou)-86(Trp)        | 20.7 (20.0–20.9)      | 6 (4–8)               | 15.2 (15.2–21.7)                      | 18 (6–18)  | 14.7 (14.4–16.4)                | 17 (13–18) | 0.56 (0.50–0.62)                      |
| 28(Sal)-71(Trp)        | 17.2 (16.4–17.7)      | 10 (8–12)             | 20.6 (17.7–21.8)                      | 12(9–17)   | 19.2 (17.6–20.1)                | 13 (5–21)  | 0.63 (0.60–0.66)                      |
| 18(Sal)-203(Trp)       | 15.2 (14.2–15.9)      | 9 (8–11)              | 34.9 (32.2–38.1)                      | 23 (16–31) | 23.3 (20.2–26.1)                | 27 (9–30)  | 0.43 (0.42–0.45)                      |

The comparisons were performed at the initial phase of refolding determined by analysis of the emission intensity detected kinetics, and by double-kinetics methods. AK, adenylate kinase; FWHM, full width at half-maximum.

<sup>a</sup>The two labeled residues and the probes used as FRET donor and acceptor.

<sup>b</sup>The final (folded) state intramolecular distribution obtained by trFRET measurements at 0.3 M GndHCl.

<sup>c</sup>The initial (collapsed) state intramolecular distance distribution obtained by double-kinetics FRET measurements at the first few milliseconds of folding.

<sup>d</sup>The initial (collapsed) state distribution obtained as extrapolation to zero-time from best-fit results of the combined analysis.

<sup>e</sup>Most probable distance out of a skewed Gaussian radial distance distribution model.

<sup>f</sup>The FWHM of a skewed Gaussian radial distance distribution model.

<sup>g</sup>The first-order apparent refolding rate constant.

were obtained from the equilibrium trFRET data of the folded state ensemble (Fig. 2 C).

Experimental intramolecular distance distributions of each labeled segment were obtained by means of the trFRET detected double-kinetics experiments within the first few milliseconds after the mixing dead-time (Fig. 2, D, blue, and Table 1). The parameters of the distance distribution of the collapsed state ensemble ( $P_C(r)$ ) were obtained both experimentally by the double-kinetics experiment, and by analysis of the  $\langle E \rangle(t)$  data using Eqs. 3 and 4 (Fig. 2 D, red, and Table 1). Excluding AK-18(Sal)-203(Trp), the collapsed state distance distributions,  $P_C(r)$ , extracted from the double-kinetics measurements were well within

the Förster critical distance range of the pairs of probes, and the FRET efficiencies from both double-kinetics and steady-state detected fluorescence kinetics were similar throughout the course of the transition, within an error of <2% (Fig. 2 C, blue squares).

The fit quality of the calculated  $\langle E \rangle(t)$  using Eqs. 4 and 5 to the experimental values was excellent, as can be judged by the fitting residuals and their autocorrelation. The collapsed-state intramolecular distance distributions,  $P_C(r)$ , calculated from the experimental  $\langle E \rangle(t)$  traces and the final state distance distribution,  $P_F(r)$ , were very similar to the ones obtained experimentally from the double-kinetics experiments (excluding the case of AK-18(Sal)-203(Trp)).

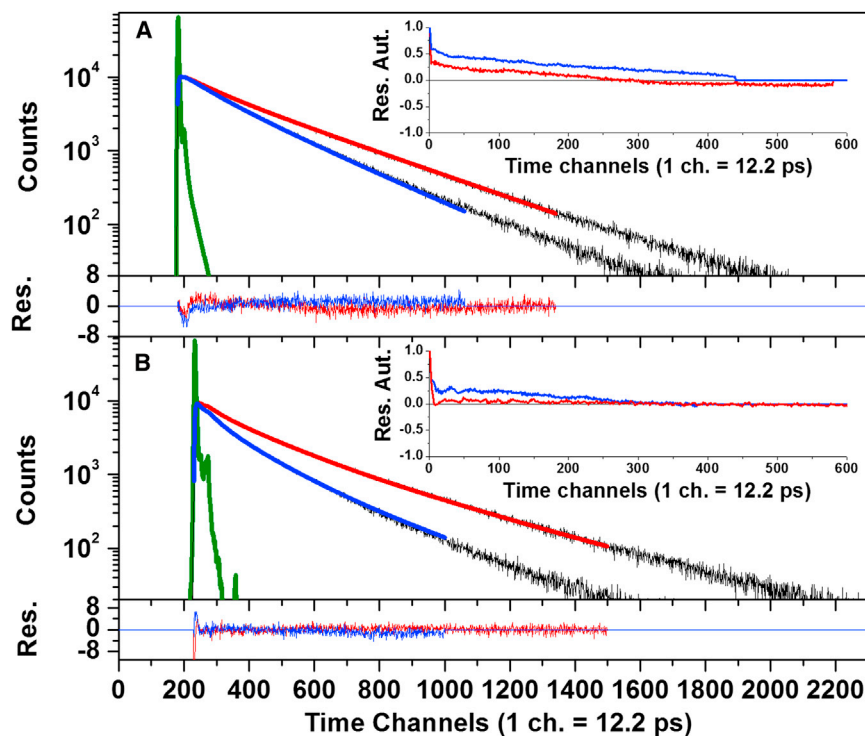

**FIGURE 3** trFRET data obtained under equilibrium conditions for the mutant AK-79(Sal)-86(Trp) in 0.3 (A), and 1.8 M (B) GndHCl and the best-fit results of global analysis employing the Haas-Steinberg model (33). The experimental donor fluorescence decay (black) in the absence (DO) and presence (DA) of an acceptor and the best-fit results (down to 1% amplitude relative to the maximum count) in the absence of acceptor (red), as well as in the presence of the acceptor (Sal) (blue); the instrument response function is also shown (green). Corresponding fitting residuals (Res.) are given (bottom of each panel) as well as their autocorrelation (Aut.; see inset). To see this figure in color, go online.

The mean and FWHM error ranges of the best-fit results were similar to those of the experimental intramolecular distance distributions (Table 1).

In summary, the method presented here may be used to determine distributions of intramolecular distances in ensembles of molecules undergoing fast changes at the initiation of the transition; this approach is based solely on the folded state equilibrium intramolecular distance distributions, and emission intensity-based determination of the kinetics of the mean transfer efficiency data.

## DISCUSSION

The kinetics of the response of macromolecules to changing conditions, such as induction or removal of physico-chemical perturbations (e.g., change of solvent) (2,5,6,24,42), ligand binding (4,8,9,13,14,26,27,43), or formation of macromolecular complexes (1,3,7,10–12), contains a wealth of information regarding key biochemical and biophysical processes. The popularity of applications based on the FRET effect in the detection of the kinetics for the macromolecular conformational transitions is based on the simple relationship between the transfer efficiency and the intra- or intermolecular distances (6,9,20,25,27). Deduction of features of the mechanism of any transition requires knowledge of the structural characteristics of the ensemble of molecules at the starting point of the transition (1,14,16).

The method presented here helps overcome a major limitation of FRET experiments based on fluorescence intensity measurements, namely, the nonlinear relationship between the distance and the mean transfer efficiency (15,18). The sixth-power dependence of the transfer efficiency prevents determination of mean interprobe distances in ensembles of multiple conformers or of heterogeneous systems without application of trFRET. Here, we developed and verified the applicability of a method to determine the transient distribution of intramolecular distances at the initiation and over the full duration of the kinetics of a conformational transition, even when trFRET measurements cannot be applied for detection of the fast transient state at the initial phase of the transition. Our approach is based on combined analysis of fluorescence intensity-detected fast kinetics, and application of trFRET measurements at the end of the transition under equilibrium conditions. The method further enables determination of the population ratio of two ensembles, the initial and the final, during the full duration of the transition in two-state transitions. The applicability of the method was demonstrated and tested in comparison to double-kinetics data, in studies of the folding transition of double-labeled mutants of AK.

### Two-state model

In a case characterized by a marked difference between the equilibrium intramolecular distance distribution in the

ensemble of the conformers in the state before the initiation of the transition (e.g., proteins under denaturing conditions) and the one immediately after initiation of the transition, the process can be described as a three-state transition (5,24) where the first and second sequential transitions are fast and slow, respectively. In most such cases, the kinetics of change of the monitored signal appears to be monoexponential (6,24,27). The method presented here, which assumes a two-state transition, does not depend on knowledge of the characteristics of the ensemble before the initiation of the transition. Only the characteristics of the final ensemble and the kinetics of change at the signal are used, and hence the two-state model can be applied.

The detailed simulations performed showed the limits of application of the method and its dependence on the parameters of the experimental system. Of particular influence is the difference between the selected intramolecular distance distributions of the initial and final ensembles and the value of the Förster critical distance,  $R_0$ , with respect to the mean of the two distance distributions. These two key parameters can be tuned by careful selection of the pair of probes and the distance to be monitored, respectively. Ideally, one would like to repeat experiments using more than one pair of probes and monitor more than a single intramolecular distance in separate experiments. The simulations also set the limit of application of the method for recovery of the initial distance distribution in the case of pseudo two-state transitions due to the existence of an intermediate state. The simulations presented in the Supporting Material can be used for design of FRET kinetics experiments with additional sets of parameters by multiplying the data presented by a single factor.

This kind of kinetic approach is well documented in other steady-state stopped-flow FRET measurements (2,6,8,24,27). The FRET kinetics fit well with a monoexponential rate law, characteristic of a two-state transition. This can be described by a three-state model having the first transition much faster than the mixing dead-time, followed by a second, slower transition. Based on a large database of both published and unpublished results studying different elements within AK (24), this molecule contains elements, such as AK-18(Sal)-71(Trp), with such characteristic three-state behavior, whereas other elements, such as AK-79(Sal/Cou)-86(Trp), show a slow two-state transition directly from unfolded to folded state equilibrium distance distributions. Thus, the overall dimension of the ensemble of conformers, but not all parts of the chain, change dimensions upon the change of solvent. We call this intermediate state “a collapsed state” (5,6) and describe here the distance distributions that characterize it.

### The test case: folding of AK mutants

The three intramolecular distance distributions obtained for the initial (collapsed) ensemble of refolding AK molecules

determined by the method presented here, and previous double-kinetics experiments, provide strong validation of our believed-new method.

The excellent agreement between the trFRET-detected double-kinetics experiment and the best-fit results of the emission intensity-based FRET detection kinetics proves its viability, at least for two-state transitions within the limits established by the simulations.

In one case, agreement was poor. The mean transfer efficiency obtained for the mutant AK-18(Sal)-203(Trp) in the collapsed state by analysis of the double-kinetics experiment in comparison to that obtained by analysis of the emission intensity determined that the  $\langle E \rangle(t)$  trace was  $\sim 2$  vs. 20%, respectively. This deviation is probably the result of the very large mean distance of the collapsed state distance distribution, which exceeds the Förster distance range of this specific pair of probes (Fig. 2 D, row 4, blue, and Table 1).

The distributions of three intramolecular distances in the AK molecule were obtained for ensembles of AK molecules in three states: denatured in 1.8 M GndHCl at the initiation of refolding; initial (collapsed) state; and at the end of the refolding transition. The folded state in 0.3 M GndHCl, shown in Fig. 2 reveals two major transitions in refolding of the CORE domain. The first transition is a fast partial reduction of the distance between residues separated by a very long chain segment (residues 18 and 203), which can be assigned to a solvent-induced collapse. The second major transition is a complex hierarchic succession of folding transitions of subdomain elements. Some elements fold by a slow two-state transition (the formation of  $\beta$ -strands between residues 79 and 86) and some fold very rapidly, immediately within the dead-time of the stopped-flow mixing experiment (the closure of the loop between residues 28 and 71). Even though the process is probably much more complex, the two-state approximation may be used for recovery of the parameters of the three intramolecular distance distributions by the method presented here.

### Three-state transition

In some cases, distinctive three-state kinetics are expected (5,6,16,44). It could be valuable to use the proposed methodology when a three-state transition is expected, by employing the extension to a possible three-state transition (see Eqs. S1–S4 in the Supporting Material). We performed auxiliary simulations testing the applicability of the proposed three-state model, in cases where both the initial and final state intramolecular distance distributions are known from equilibrium trFRET, and the unknowns are the intermediate state distance distribution and the two rate constants (see the Supporting Material and Spreadsheet S1 in the Supporting Material). The factors that improve the accuracy in predicting the known parameters are the time variation between the two transitions, the difference between the mean of the intermediate distance distribution

and those of the known initial and final states, and the proper choice of a pair of probes with optimal  $R_0$  value. Moreover, one should remember that without early knowledge of an underlying three-state transition, the usage of a three-state transition model will be assessed in comparison to the simpler two-state model by the traditional statistical model comparison tools.

### CONCLUDING REMARKS

The protein folding transition, which is the most extensive type of conformational transition of biopolymers, is a sum of formation of multiple interacting pairs; hence, even the main transition is often very cooperative, and mapping of each subdomain transition is essential for a full description and understanding of the mechanism of folding. Methods based on magnetic resonance measurements (45–49) are powerful, enabling many atoms to serve as structural probes in a single mutant molecule. However, partially folded macromolecular systems generally form ensembles of multiple conformers that should be characterized in statistical terms of distributions of structural parameters. The trFRET-based methods, although limited to a single pair per measurement, can be used to determine intramolecular distance distributions and their fast changes down to the nanosecond timescale. The double-kinetics methods, which can be applied with any kind of fast or ultrafast induction or relaxation of structural perturbations, yield such information. So why go back to emission intensity-based FRET measurements? The importance of the method presented here stems from the need to measure many distributions of intramolecular distances in many mutants to ultimately relate structural elements to subdomain and global folding events, and their progression. Because the double-kinetics method requires much larger amounts of each sample and very sophisticated instrumentation, the high throughput work needed in the study of protein folding, as well as any other conformational transitions, can gain much from the combination of recording traces of emission intensity measurements and equilibrium trFRET measurements.

### SUPPORTING MATERIAL

Applicability of the Model—Simulation Setup, Validity of the Model—Simulation Setup, Treatment for Three-State Processes, Supporting Spreadsheet, Supporting MATLAB files, Screen Shot Series, Workspace Parameters, seven equations (numbered), two unnumbered equations, and one figure are available at [http://www.biophysj.org/biophysj/supplemental/S0006-3495\(13\)05797-4](http://www.biophysj.org/biophysj/supplemental/S0006-3495(13)05797-4).

The authors thank Menachem Shneiberg, Eli Zimmerman, and David Freedman for excellent technical assistance and to Gershon Hazan, Gil Rahamim, and Sivan Shemesh for fruitful discussions.

This study was supported by grants from the Israel Science Foundation (ISF grant No. 1464/10), the United States–Israel Binational Science Foundation (grant No. 2011143), and the ISF-ICORE (grant No. 1902/12).



## REFERENCES

- Tang, J., R. S. Signarvic, ..., F. Gai. 2007. Role of helix nucleation in the kinetics of binding of mastoparan X to phospholipid bilayers. *Biochemistry*. 46:13856–13863.
- Magg, C., and F. X. Schmid. 2004. Rapid collapse precedes the fast two-state folding of the cold shock protein. *J. Mol. Biol.* 335:1309–1323.
- Lucius, A. L., C. J. Wong, and T. M. Lohman. 2004. Fluorescence stopped-flow studies of single turnover kinetics of *E. coli* RecBCD helicase-catalyzed DNA unwinding. *J. Mol. Biol.* 339:731–750.
- Anderlüh, G., Q. Hong, ..., J. H. Lakey. 2003. Concerted folding and binding of a flexible colicin domain to its periplasmic receptor TolA. *J. Biol. Chem.* 278:21860–21868.
- Nishimura, C., R. Riley, ..., A. L. Fink. 2000. Fluorescence energy transfer indicates similar transient and equilibrium intermediates in staphylococcal nuclease folding. *J. Mol. Biol.* 299:1133–1146.
- Dasgupta, A., and J. B. Udgaonkar. 2010. Evidence for initial non-specific polypeptide chain collapse during the refolding of the SH3 domain of PI3 kinase. *J. Mol. Biol.* 403:430–445.
- Capraro, B. R., Z. Shi, ..., T. Baumgart. 2013. Kinetics of endophilin N-BAR domain dimerization and membrane interactions. *J. Biol. Chem.* 288:12533–12543.
- Dong, W. J., J. An, ..., H. C. Cheung. 2006. Structural transition of the inhibitory region of troponin I within the regulated cardiac thin filament. *Arch. Biochem. Biophys.* 456:135–142.
- Dong, W. J., J. J. Jayasundar, ..., H. C. Cheung. 2007. Effects of PKA phosphorylation of cardiac troponin I and strong crossbridge on conformational transitions of the N-domain of cardiac troponin C in regulated thin filaments. *Biochemistry*. 46:9752–9761.
- Maxwell, B. A., C. Xu, and Z. Suo. 2012. DNA lesion alters global conformational dynamics of Y-family DNA polymerase during catalysis. *J. Biol. Chem.* 287:13040–13047.
- Pernstich, C., and S. E. Halford. 2012. Illuminating the reaction pathway of the *FokI* restriction endonuclease by fluorescence resonance energy transfer. *Nucleic Acids Res.* 40:1203–1213.
- Phillips, N. B., J. Racca, ..., M. A. Weiss. 2011. Mammalian testis-determining factor SRY and the enigma of inherited human sex reversal: frustrated induced fit in a bent protein-DNA complex. *J. Biol. Chem.* 286:36787–36807.
- Szilvay, G. R., M. A. Blenner, ..., S. Banta. 2009. A FRET-based method for probing the conformational behavior of an intrinsically disordered repeat domain from *Bordetella pertussis* adenylate cyclase. *Biochemistry*. 48:11273–11282.
- Nesmelov, Y. E., R. V. Agafonov, ..., D. D. Thomas. 2011. Structural kinetics of myosin by transient time-resolved FRET. *Proc. Natl. Acad. Sci. USA.* 108:1891–1896.
- Haas, E. 2005. The study of protein folding and dynamics by determination of intramolecular distance distributions and their fluctuations using ensemble and single-molecule FRET measurements. *ChemPhysChem.* 6:858–870.
- Huang, F., E. Lerner, ..., A. R. Fersht. 2009. Time-resolved fluorescence resonance energy transfer study shows a compact denatured state of the B domain of protein A. *Biochemistry*. 48:3468–3476.
- Huang, F., S. Rajagopalan, ..., A. R. Fersht. 2009. Multiple conformations of full-length p53 detected with single-molecule fluorescence resonance energy transfer. *Proc. Natl. Acad. Sci. USA.* 106:20758–20763.
- Förster, T. 1948. Intermolecular energy migration and fluorescence [Zwischenmolekulare energiewanderung und fluoreszenz]. *Ann. Phys.* 437:55–75.
- Ratner, V., and E. Haas. 1998. An instrument for time resolved monitoring of fast chemical transitions: application to the kinetics of refolding of a globular protein. *Rev. Sci. Instrum.* 69:2147–2154.
- Ratner, V., M. Sinev, and E. Haas. 2000. Determination of intramolecular distance distribution during protein folding on the millisecond timescale. *J. Mol. Biol.* 299:1363–1371.
- Arai, M., M. Iwakura, ..., O. Bilsel. 2011. Microsecond subdomain folding in dihydrofolate reductase. *J. Mol. Biol.* 410:329–342.
- Ben Ishay, E., G. Rahamim, ..., E. Haas. 2012. Fast subdomain folding prior to the global refolding transition of *E. coli* adenylate kinase: a double kinetics study. *J. Mol. Biol.* 423:613–623.
- Ben Ishay, E., G. Hazan, ..., E. Haas. 2012. An instrument for fast acquisition of fluorescence decay curves at picosecond resolution designed for “double kinetics” experiments: application to fluorescence resonance excitation energy transfer study of protein folding. *Rev. Sci. Instrum.* 83:084301.
- Orevi, T., E. Ben Ishay, ..., E. Haas. 2009. Early closure of a long loop in the refolding of adenylate kinase: a possible key role of non-local interactions in the initial folding steps. *J. Mol. Biol.* 385:1230–1242.
- Ratner, V., D. Amir, ..., E. Haas. 2005. Fast collapse but slow formation of secondary structure elements in the refolding transition of *E. coli* adenylate kinase. *J. Mol. Biol.* 352:683–699.
- Xing, J., J. J. Jayasundar, ..., W. J. Dong. 2009. Förster resonance energy transfer structural kinetic studies of cardiac thin filament deactivation. *J. Biol. Chem.* 284:16432–16441.
- Robinson, J. M., H. C. Cheung, and W. Dong. 2008. The cardiac Ca<sup>2+</sup>-sensitive regulatory switch, a system in dynamic equilibrium. *Biophys. J.* 95:4772–4789.
- Voelz, V. A., M. Jäger, ..., V. S. Pande. 2012. Slow unfolded-state structuring in Acyl-CoA binding protein folding revealed by simulation and experiment. *J. Am. Chem. Soc.* 134:12565–12577.
- Müller, C. W., G. J. Schlauderer, ..., G. E. Schulz. 1996. Adenylate kinase motions during catalysis: an energetic counterweight balancing substrate binding. *Structure.* 4:147–156.
- Sinev, M. A., E. V. Sineva, ..., E. Haas. 1996. Domain closure in adenylate kinase. *Biochemistry*. 35:6425–6437.
- Sinev, M., P. Landsmann, ..., E. Haas. 2000. Design consideration and probes for fluorescence resonance energy transfer studies. *Bioconjug. Chem.* 11:352–362.
- Jacob, M. H., D. Amir, ..., E. Haas. 2005. Predicting reactivities of protein surface cysteines as part of a strategy for selective multiple labeling. *Biochemistry*. 44:13664–13672.
- Beechem, J. M., and E. Haas. 1989. Simultaneous determination of intramolecular distance distributions and conformational dynamics by global analysis of energy transfer measurements. *Biophys. J.* 55:1225–1236.
- Haas, E., and I. Z. Steinberg. 1984. Intramolecular dynamics of chain molecules monitored by fluctuations in efficiency of excitation energy transfer. A theoretical study. *Biophys. J.* 46:429–437.
- Orevi, T., E. Lerner, ..., E. Haas. 2014. Ensemble and single-molecule detected time-resolved FRET methods in studies of protein conformations and dynamics. *Methods Mol. Biol.* 1076:113–169.
- Haran, G., E. Haas, ..., M. T. Mas. 1992. Domain motions in phosphoglycerate kinase: determination of interdomain distance distributions by site-specific labeling and time-resolved fluorescence energy transfer. *Proc. Natl. Acad. Sci. USA.* 89:11764–11768.
- Grinvald, A., E. Haas, and I. Z. Steinberg. 1972. Evaluation of the distribution of distances between energy donors and acceptors by fluorescence decay. *Proc. Natl. Acad. Sci. USA.* 69:2273–2277.
- Haas, E., E. Katchalski-Katzir, and I. Z. Steinberg. 1978. Effect of the orientation of donor and acceptor on the probability of energy transfer involving electronic transitions of mixed polarization. *Biochemistry*. 17:5064–5070.
- Li, P., F. Y. Oliva, ..., V. Muñoz. 2009. Dynamics of one-state downhill protein folding. *Proc. Natl. Acad. Sci. USA.* 106:103–108.
- Liu, J., L. A. Campos, ..., V. Muñoz. 2012. Exploring one-state downhill protein folding in single molecules. *Proc. Natl. Acad. Sci. USA.* 109:179–184.

41. Oliva, F. Y., and V. Muñoz. 2004. A simple thermodynamic test to discriminate between two-state and downhill folding. *J. Am. Chem. Soc.* 126:8596–8597.
42. Teilum, K., K. Maki, ..., H. Roder. 2002. Early kinetic intermediate in the folding of acyl-CoA binding protein detected by fluorescence labeling and ultrarapid mixing. *Proc. Natl. Acad. Sci. USA.* 99:9807–9812.
43. Stengel, G., J. P. Gill, ..., D. Millar. 2007. Conformational dynamics of DNA polymerase probed with a novel fluorescent DNA base analogue. *Biochemistry.* 46:12289–12297.
44. Jacobs, D. J., D. Trivedi, ..., C. M. Yengo. 2011. Kinetics and thermodynamics of the rate-limiting conformational change in the actomyosin V mechanochemical cycle. *J. Mol. Biol.* 407:716–730.
45. Hu, K. N., W. M. Yau, and R. Tycko. 2010. Detection of a transient intermediate in a rapid protein folding process by solid-state nuclear magnetic resonance. *J. Am. Chem. Soc.* 132:24–25.
46. Killick, T. R., S. M. Freund, and A. R. Fersht. 1999. Real-time NMR studies on a transient folding intermediate of barstar. *Protein Sci.* 8:1286–1291.
47. Oliveberg, M., and A. R. Fersht. 1996. Thermodynamics of transient conformations in the folding pathway of barnase: reorganization of the folding intermediate at low pH. *Biochemistry.* 35:2738–2749.
48. Andréasson, L. E., R. Brändén, and B. Reinhammar. 1976. Kinetic studies of *Rhus vernicifera* laccase. Evidence for multi-electron transfer and an oxygen intermediate in the reoxidation reaction. *Biochim. Biophys. Acta.* 438:370–379.
49. Magnusson, O. T., G. H. Reed, and P. A. Frey. 2001. Characterization of an allylic analogue of the 5'-deoxyadenosyl radical: an intermediate in the reaction of lysine 2,3-aminomutase. *Biochemistry.* 40:7773–7782.

## Supporting Material

### Kinetics of fast changing intramolecular distance distributions obtained by combined analysis of FRET efficiency kinetics and time resolved FRET equilibrium measurements

E. Lerner and T. Orevi, E. Ben Ishay, D. Amir, E. Haas\*

The Mina and Everard Goodman Faculty of Life Sciences, Bar Ilan University, Ramat Gan, Israel

\* Corresponding author [Elisha.Haas@biu.ac.il](mailto:Elisha.Haas@biu.ac.il)

#### Applicability of the model –simulation setup

Mean FRET efficiency kinetics data  $\langle E \rangle(t)$ , were simulated and tested assuming time independent  $R_o$  values using *Eq. 4*. The input for preparation of simulated transfer efficiency kinetics data were initial and final distance distributions assuming several combinations of the parameters  $a$ ,  $b$  and  $R_o$ , and folding rate constant,  $k_F$ , of  $0.2 \text{ s}^{-1}$ . Gaussian noise profile was added to the simulated curves with standard deviation similar to that known for the experimental stopped flow apparatus used in our lab (1), typically 1%. The simulated curves were then analyzed using the fitting of a theoretical curve obtained by computation of  $\langle E \rangle(t)_{calc}$  with input of the simulated  $P_F(r)$  (fixed), determined from equilibrium trFRET measurements;  $P(r)_{c,calc}$  and  $k_{F,calc}$ , the free parameters, were then recovered.

The extent of deviation of the fitted  $P(r)_{c,calc}$  from the simulated  $P(r)_{c,simul}$  was then assessed by the following parameters: their overlap area, the relative deviation of their peak, FWHM and  $k_F$  values, and most importantly, the 95% confidence interval error ranges of peak, FWHM of  $P(r)_{c,calc}$  and of  $k_F$ . The simulated and best fit parameters as well as the comparison parameters, for a total of 720 combinations of simulated distance distributions, rate constant, and  $R_o$ , are summarized in Supporting spreadsheet S1. The conclusions of the simulation results are reported in the main text and are based on the improvements in error ranges while gradually changing the simulated parameter sets that were free parameters in model fitting.

#### Validity of the model –simulation setup

To assess the limits of the two-state approximation, in realms that may deviate from such a scenario, we synthesized average FRET efficiency kinetics for various types of such deviations from two-state transition and then analyzed the resulting kinetics, after Gaussian noise profile addition, using either a mono-exponential function or the our two-state model (*Eq. 3+4*). The deviations from a simple two state scenario that were implemented were:

1. An underlying three state transition.
2. Two state transition with a time-dependent  $R_o$ .
3. Two state transition with a mixture of different rate constants at different fluxes
  - a. Central distribution of rate constants
  - b. Two discrete rate constants with two relative fluxes
4. Unimodal (one state) transition
5. Two state transition with the initial-state having high intramolecular flexibility

A three state model is described in Eqs. S1-S4. The resulting FRET kinetics curves were fit to our two-state model, described in *Eq. 4*. Tests of the quality of fit yielded three-state parameter ranges at which the two-state approximation fails; the resulting conclusions are reported in the main text. The Supporting spreadsheet S1 shows the simulated FRET kinetics goodness-of-fit to a two-state model.

In the case of a two state model with  $R_0$  changing throughout the transition, average FRET efficiency kinetic curves were simulated by the use of Eq. 3 and fit to a mono-exponential function. Tests of the quality of fit yielded criteria for  $R_0$  values for which the mono-exponential approximation fails. Typical  $R_0$  value changes (up to 2 Å) were used. The Supporting spreadsheet S1 shows the quality of the fit. As reported in the main text, this possibility does not introduce changes in the mono-exponential trends of the transitions.

Two state model average FRET efficiency kinetic traces with either two discrete rate constants or a central distribution of rate constants, were synthesized with values in the range of 0.1-1.0 s<sup>-1</sup>. These, in turn, were fitted to a mono-exponential function. In the case of two discrete rate constants, for a 0.5:0.5 flux ratio, the curves deviated from the mono-exponential function with a rate constant difference of 0.1 s<sup>-1</sup>. The higher the flux ratio, the higher the allowed rate constant difference. At a 0.95:0.05 flux ratio, the maximal allowed rate constant difference was 0.4 s<sup>-1</sup>. In the case of a central distribution of rate constants, the maximal allowed standard deviation was 0.4 s<sup>-1</sup>.

A unimodal transition is indicated by a gradual change of conformation (2-4). A unimodal FRET efficiency detected transition was simulated as a gradual exponential change not of the population fraction of the two states,  $f(t)$ , but of both PEAK and FWHM values of the transient distance distribution, between  $P_C(r)$  and  $P_F(r)$ . Examples of such average efficiency kinetics in comparison to their two-state counterparts are shown in Fig. S1. One can see that average transfer efficiency kinetics of unimodal transitions are far from exponential.

We used the Haas-Steinberg (5, 6) equations to produce donor fluorescence decay curves corresponding to a given distance distribution with intramolecular diffusion coefficients ranging from 0 to 20 Å<sup>2</sup>/ns (a high value reported for unfolded proteins) and then checked the extent to which raising the flexibility changed average transfer efficiency kinetics. The maximal increase was 5% which is within the error ranges.

### Treatment for Three-State Processes

For the following three-state transition,  $R \rightarrow I \rightarrow P$  the results of the states' kinetics laws are shown in Eqs. S1

$$\begin{aligned} [R](t) &= C_2 e^{-k_I t} \\ [I](t) &= C_1 e^{-k_P t} - C_2 [k_I / (k_I - k_P)] e^{-k_I t} \\ [P](t) &= N - [I](t) - [R](t) \\ N &= \text{Const.} \end{aligned} \quad (\text{S1})$$

where  $N$ , is the total amount of molecules, which is constant (conserved);  $[R]$ ,  $[I]$  and  $[P]$ , are the time dependent concentrations of the Reactants-initial, Intermediate and Product-final state species respectively;  $k_I$ , and  $k_P$ , are the rate constants of the first and second transitions, respectively; and  $C_1$  and  $C_2$ , are kinetic coefficients.

Assuming that at  $t=0$  there are non-negligible occupancies of only states  $R$  and  $I$ , we find that the coefficients,  $C_1$  and  $C_2$ , of Eq. S1 are shown in Eq. S2.

$$\begin{aligned} C_1 &= N + \frac{k_P}{k_I - k_P} \cdot U(t=0) \\ C_2 &= R(t=0) \end{aligned} \quad (\text{S2})$$

Substitution of the coefficients to the kinetic Eq. S1 and division by the total amount of matter,  $N$ , obtain kinetic traces of the states' fractions as is shown in Eqs. S3

$$\begin{aligned} \alpha_R(t) &= \alpha_R(0) e^{-k_I t} \\ \alpha_I(t) &= e^{-k_P t} + [\alpha_R(0) / (k_I - k_P)] (k_P e^{-k_P t} - k_I e^{-k_I t}) \\ \alpha_P(t) &= 1 - \alpha_I(t) - \alpha_R(t) \end{aligned} \quad (\text{S3})$$

having  $\alpha_R$ ,  $\alpha_I$  and  $\alpha_P$  as the initial, intermediate and final state occupancies.

Then, if each state,  $i$ , can be characterized by a three-dimensional radial distance distribution,  $P_i(r)$ , as in Eqs. S4, the joint distance distribution at each time point,  $P(r,t)$ , should be a superposition of the three, weighted by their occupancies, as shown in Eqs. S4.

$$P(r,t) = \sum_i \alpha_i(t) p_i(r); i \in \{R, I, P\}$$

$$p_i(r) = 4\pi r^2 e^{-b_i(r-a_i)^2} \quad (\text{S4})$$

Using Eqs. S3 and S4 in the framework of the model described by Eq. 3, as a fitting model, while knowing the folded state characteristics (therefore holding them constant), one can retrieve the state characteristics of  $R$  and  $I$ , the two rate constants and the  $R \leftrightarrow I$  equilibrium, through the  $R$  state fraction at equilibrium.

Maintaining both  $R$  and  $P$  distributions as free parameters is assumed to yield large error ranges. Nevertheless, knowledge of the initial- and final-state distributions,  $R$  and  $P$ , can reduce error ranges of the rate constants and the intermediate distributions.

In order to assess the limits of the applicability of the three state transition model, we modeled average FRET efficiency kinetics using Eqs. S1-S4 and Eq. 4, added noise and then fitted the resulting kinetic data back to our three-state model, having the initial and final state distributions as constant constraints. Tests of the quality of fit yielded intermediate state distributions and rate constant parameter ranges, for which the proposed three-state model can yield acceptable results. The extent of deviation of the fitted  $P(r)_{I,calc}$  from the simulated  $P(r)_{I,simul}$  was then assessed by the following parameters: the 95% confidence interval error ranges of peak, and FWHM of  $P(r)_{I,calc}$  and of  $k_I$  and  $k_P$ . The simulated and best fit parameters, as well as the comparison parameters, for a total of 5400 combinations of simulated distributions, rate constants, and  $R_o$ , are summarized in the Supporting spreadsheet S1.

### Time dependent $R_o$

Tryptophan fluorescence spectrum and quantum yield is strongly solvent dependent (7-11). Additional changes can be caused by solvent relaxation (12-14) in the excited state (14-17). An initial change of the Trp emission spectrum, intensity and lifetime occurs upon dilution of the denaturant. This is followed by specific conformation-related effects such as interactions with main chain and side chain atoms that enhance or reduce the decay of the emission. In the stopped flow apparatus used in the current study, Trp emission was selected by a band-pass filter, which covers the entire range of AK Trp fluorescence emission spectra, 330-370 nm (BP 357/44 nm).

We can therefore conclude that the changes in fluorescence intensity of the DO mutant, after the mixing dead-time of the Stopped-Flow apparatus, is mostly due to quantum yield changes. The value of the donor quantum yield for calculation of the time dependent  $R_o$  values,  $R_o(t)$ , can be obtained from the ratio of the Trp emission intensity at any time to its final value after completion of the folding transition, as shown in Eq. S5.

$$\frac{R_o(t)}{R_o(t \rightarrow \infty)} = \left[ \frac{\varphi_D(t)}{\varphi_D(t \rightarrow \infty)} \right]^{1/6} = \left[ \frac{I_{DO}(t)}{I_{DO}(t \rightarrow \infty)} \right]^{1/6} \quad (\text{S5})$$

where  $R_o$ ,  $\varphi_D$  and  $I_{DO}$  are the Förster critical distance, donor fluorescence quantum yield, and intensity in the absence of an acceptor.

A  $R_o$  time-vector was therefore calculated and implanted in the model (Fig. 2, B). The simulations showed no deviation of the transfer efficiency change kinetics from mono-exponential trend.

## *Calculation of the kinetics of changes of transfer efficiency in the combined analysis of the donor emission intensities and the equilibrium trFRET data*

We calculated the kinetics of changes of the mean transfer efficiency,  $\langle E \rangle(t)$ , as a ratio of donor fluorescence intensities,  $I_i$ , as in Eq. S6

$$\langle E \rangle(t) = 1 - l I_{DA}(t) / I_{DO}(t) \quad (S6)$$

where  $i$  is for either DO or DA measurements. The  $l$  parameter accounts for extensive possible differences between DO and DA fluorescence intensities, such as different concentrations.  $l$  is calculated from the trFRET efficiencies in the final state at equilibrium as in Eq. S7

$$\langle E \rangle(t \rightarrow \infty) = 1 - l I_{DA}(t \rightarrow \infty) / I_{DO}(t \rightarrow \infty) = 1 - \langle \tau \rangle_{DA} / \langle \tau \rangle_{DO} \quad (S7)$$

where  $\langle \tau \rangle_{DA}$  and  $\langle \tau \rangle_{DO}$  are the average donor fluorescence lifetimes of DA and DO in the final-state at equilibrium.

### **Supporting Spreadsheet**

The full dataset of simulated parameters that were used to synthesize the transfer efficiency kinetics together with the best model fitting results and statistical and model comparison parameters, are reported in a Supporting Excel Spreadsheet S1. Supporting spreadsheet S1 is organized in several tabs, each summarizing a different type of simulation: tab '2state', in which the applicability of the proposed model in Eq. 4 was checked against a given set of distributions and a rate constant parameter; tab '2 states approximation on 3 states', in which the validity of the two-state proposed model in Eq. 4 was checked against an underlying three-state scenario, produced using *Eqs. S1-S4*; tab 'exponentiality when  $R_0$  changes', in which the validity of the model proposed in *Eq. 4* is checked against cases with a time change of the Förster Radius,  $R_0$ ; tab '3state', in which the applicability of the model proposed in *Eqs. S1-S4* and *Eq. 4* was checked against a given set of intermediate state IDDs, rate constants and  $R_0$  values. Each column in each tab of spreadsheet S1 is described in comments of the headers. One can go through different possible realms by filtering columns of desired parameters.

### **Supporting Matlab files**

1. 'model\_implementation.m' – shows how to basically implement the model proposed in this work
2. 'pop2\_kinetics\_fit\_simple.m' – a function that calculates FRET kinetics assuming a constant time invariant  $R_0$  value throughout kinetics
3. 'pop2\_kinetics\_fit\_R0.m' - a function that calculates FRET kinetics assuming a  $R_0$  value changing throughout kinetics
4. 'time\_variable\_R0.m' – a function that calculates the  $R_0$  kinetics from Donor-Only fluorescence intensity kinetics from Eq. S5
5. 'FRET\_kinetics.m' – a function that calculates the mean FRET efficiency,  $\langle E \rangle$ , kinetics out of donor fluorescence intensity kinetics and fixing it to the  $\langle E \rangle$  value at infinite time known from equilibrium trFRET measurements
6. 'SkewedGaussian.m' - a function that calculates a normalized skewed Gaussian distance distribution and its PEAK and FWHM values
7. 'exponential\_kinetics.m' – a function used for fitting intensity kinetics with as mono-exponential

### **Supporting Figures**

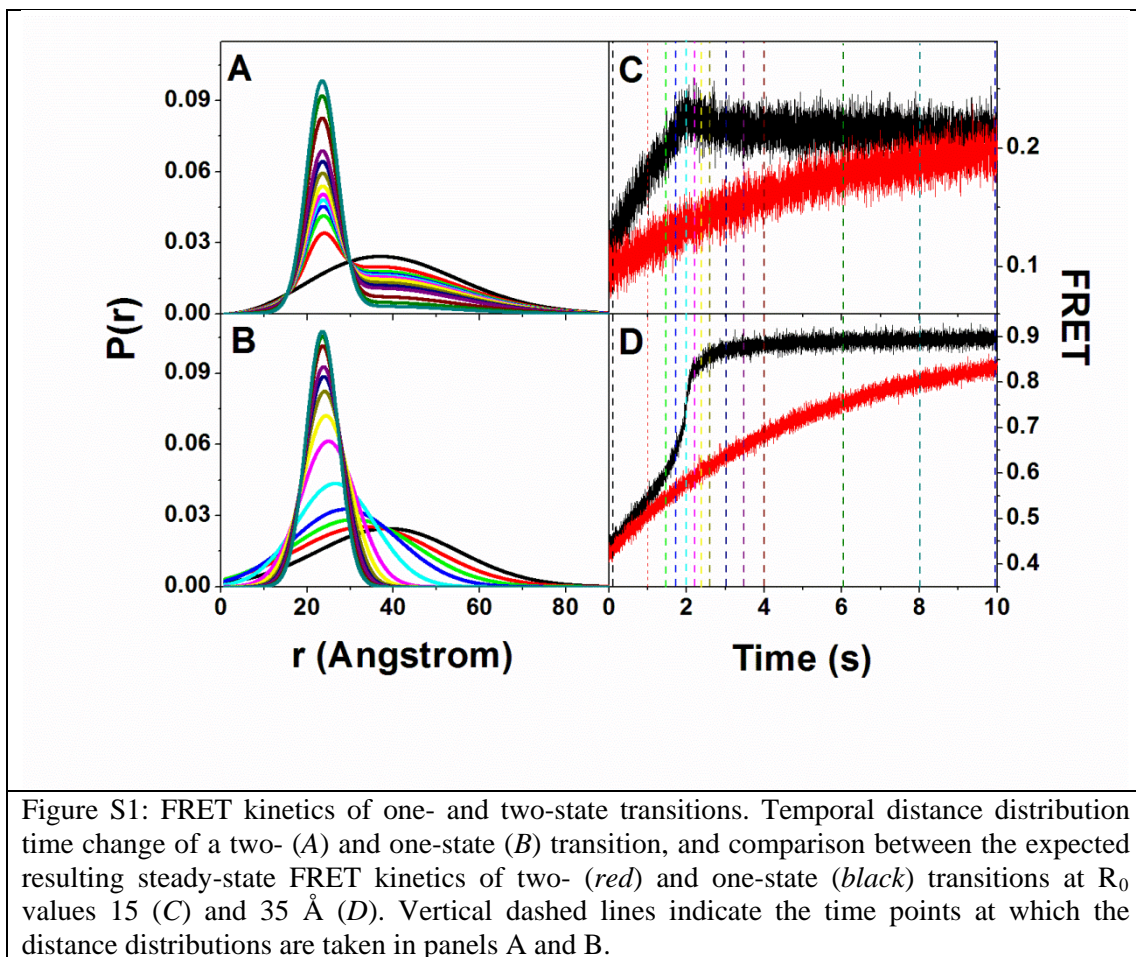

### Analysis of FRET Eff. Kinetics – program manual

Input time vector of kinetic traces in '*tDO*' (for DO experiment) and '*tDA*' (for DA experiment) and intensity vector of kinetic traces in '*DO\_kinetics*' (for DO experiment) and in '*DA\_kinetics*' (for DA experiment). Together with an list of variables important for the analysis, '*options*', all these variables are found (as an example) in the file '*matlabStart.mat*'.

Work in a directory that includes all *.m* files.

Start analysis by entering '*model\_implementation;*' command in the Matlab workspace.

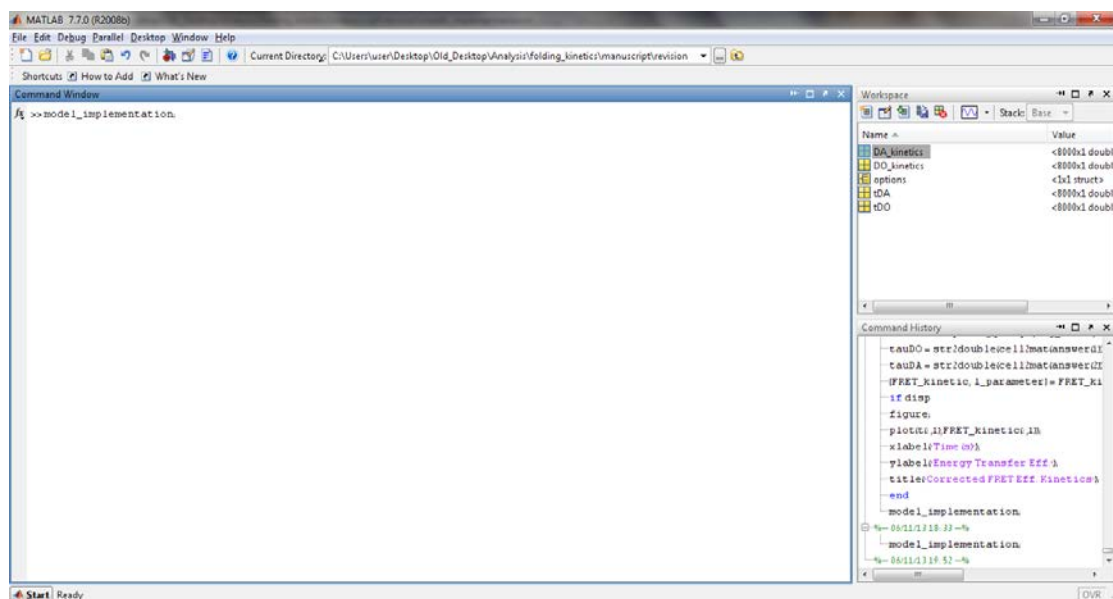

A question pops up asking '*Display figures of results in Real Time?*'. If you want figures that portrait results of the stages of the analysis choose '*Yes*'. Otherwise choose '*No*'.

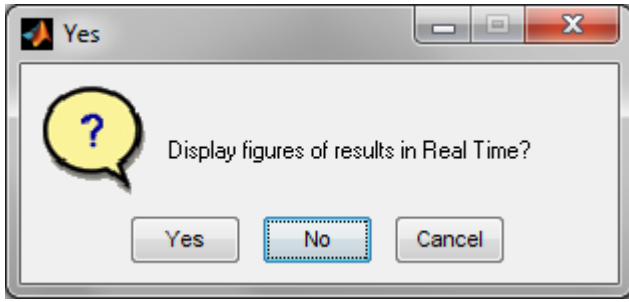

After Choosing 'Yes' the next result shows the raw data of the DO and DA donor fluorescence kinetic traces.

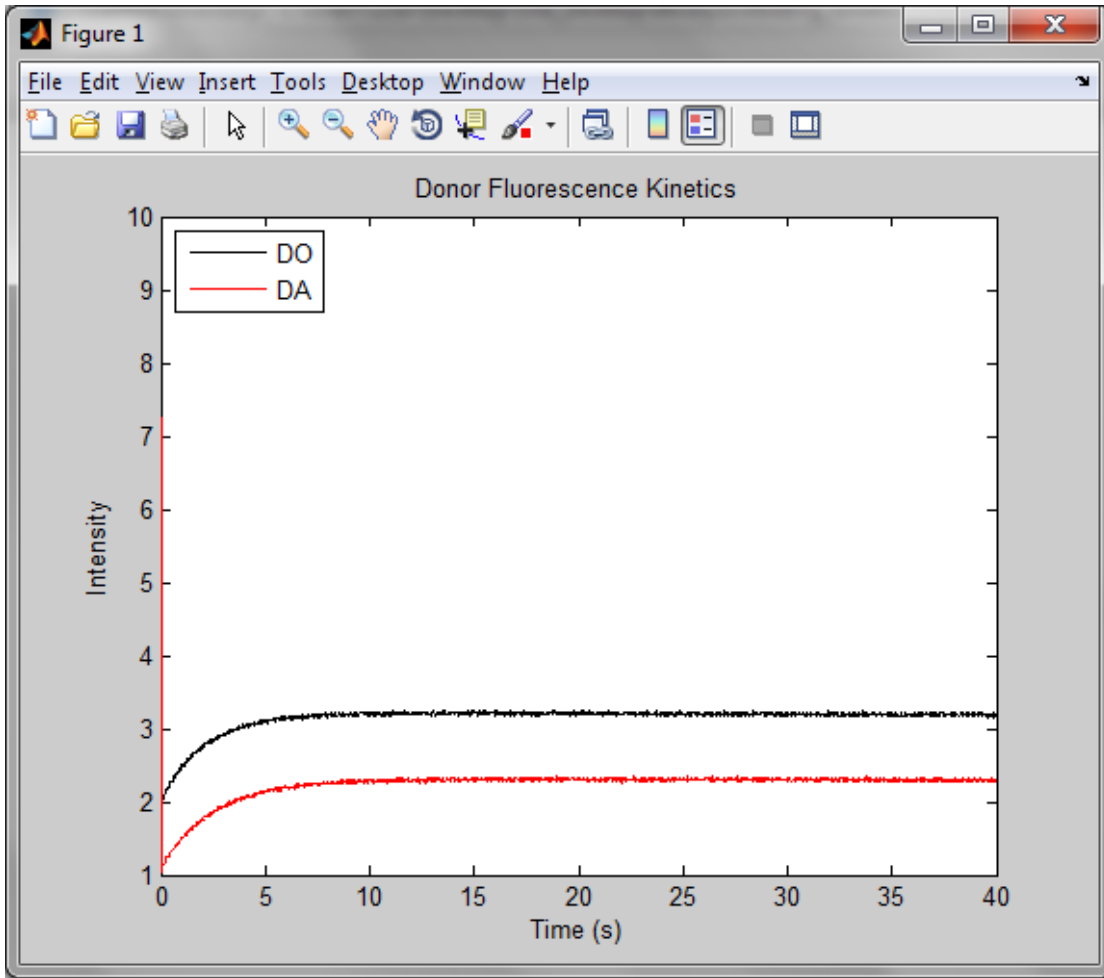

Next pops a dialogue box that asks for the donor fluorescence mean lifetimes for DO and DA ('Mean Donor Lifetime for DO' and 'Mean Donor Lifetime for DA', respectively) experiments that were measured in Equilibrium for the Final-state. Change the default values to the values relevant to your analysis, then press 'OK' to proceed with the analysis.

This step is important for the calculation of the FRET Eff. Kinetic trace. The FRET Eff. Kinetics is corrected for possible concentration differences between DO and DA measurements. The correction is performed by using the equation (Eqs S6, S7 from the article):

$$\langle E \rangle_{Final} = 1 - \frac{\tau_{DA}}{\tau_{DO}} = \lim_{t \rightarrow \infty} \langle E \rangle(t)$$

$$\langle E \rangle(t) = 1 - l \frac{I_{DA}(t)}{I_{DO}(t)}$$

Therefore, the  $l$  correction parameter is found so that the FRET Eff. at the end of the kinetic trace will equal that of the final-state equilibrium out of trFRET.



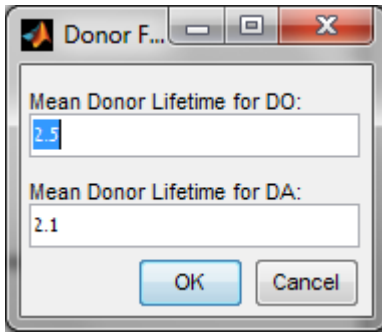

Choose 'OK'. Afterwards, the corrected FRET Eff. Kinetic trace will be shown.

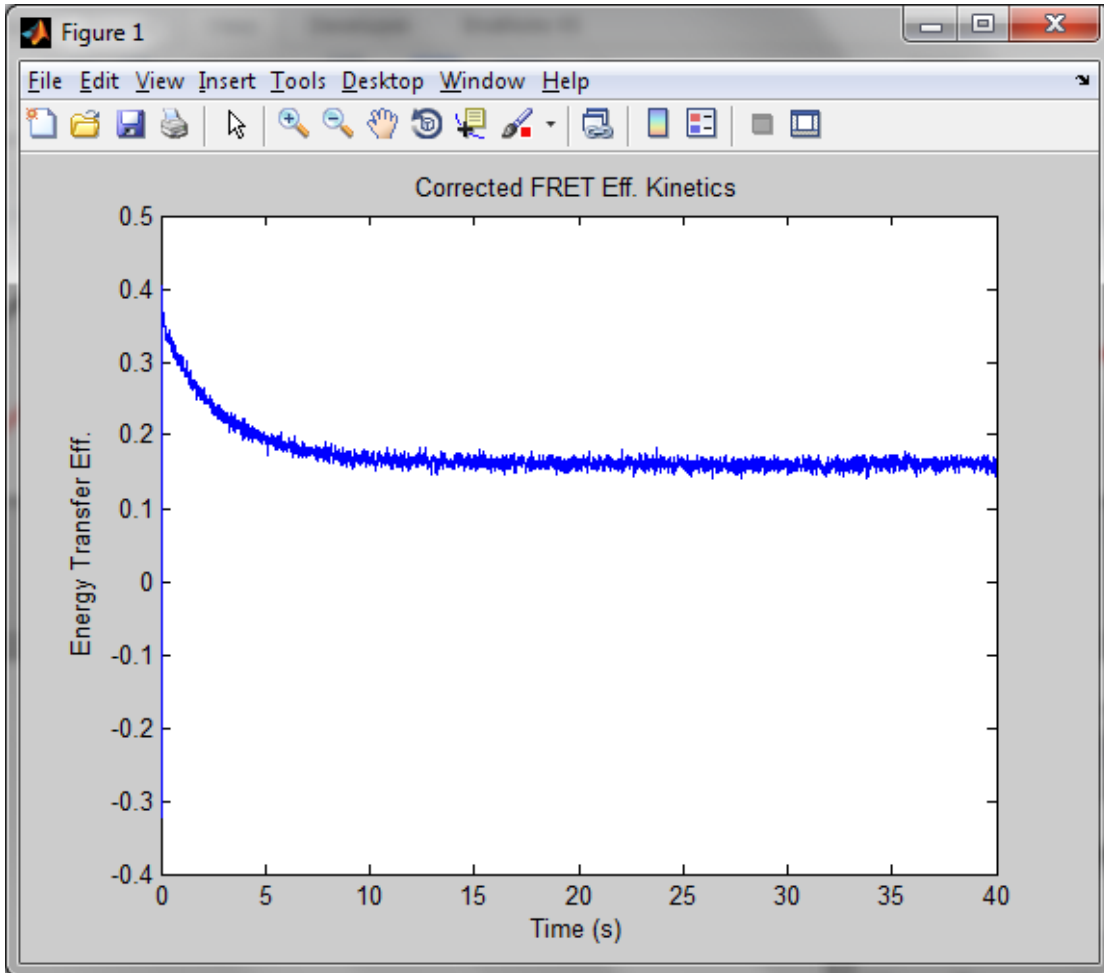

Then a question will pop up. The question asks the user for the time range for fitting (from 'From t' to 'To t'). It is not in time units of time but rather in units of numbers of cells in the time vector. After choosing the time range suitable for fitting, click 'OK'.

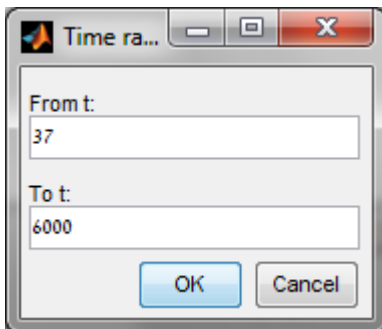

Then a dialogue box 'Input parameters' pops up. It asks for initial guesses of the values of the free parameters, as well as the known Final-state distance distribution parameters:

1. 'Enter guess for parameter  $a$  of initial-state distribution' – The initial-state distance distribution if of the form  $Norm \cdot r^2 e^{-b(r-a)^2}$ . This is for the unknown  $a$  parameter to be optimized by the analysis.
2. 'Enter guess for parameter  $b$  of initial-state distribution' – The initial-state distance distribution if of the form  $Norm \cdot r^2 e^{-b(r-a)^2}$ . This is for the unknown  $b$  parameter to be optimized by the analysis.
3. 'Enter guess for parameter  $k$  constant for kinetics' – This is the unknown two-state rate constant to be optimized by the analysis.
4. 'Enter Folded-state  $a$  parameter' - The final-state distance distribution if of the form  $Norm \cdot r^2 e^{-b(r-a)^2}$ . This is for the  $a$  parameter already found out of trFRET analysis of the equilibrium of final-state.
5. 'Enter Folded-state  $b$  parameter' - The final-state distance distribution if of the form  $Norm \cdot r^2 e^{-b(r-a)^2}$ . This is for the  $b$  parameter already found out of trFRET analysis of the equilibrium of final-state.

Next choose 'OK'.

Input parameters

Enter guess for parameter  $a$  of Initial-state distribution:  
20

Enter guess for parameter  $b$  of Initial-state distribution:  
0.001

Enter guess for parameter  $k$  constant for kinetics:  
1

Enter Folded-state  $a$  parameter:  
22.08

Enter Folded-state  $b$  parameter:  
0.0873

OK Cancel

Then a dialogue box 'Input parameters' pops up. It asks for the value of  $R_0$  found (by steady-state fluorescence measurements) in the equilibrium of the final-state. After entering its value choose 'OK'.

Input parameters

Enter value of  $R_0$  in Angstrom:  
17.3

OK Cancel

Now pops a question 'Is  $R_0$  constant throughout the kinetics?'.

If DO kinetic trace is not changing throughout time, press 'Yes'. Then the analysis will use Eq. 4 from the article.

If DO kinetic trace is changing throughout time press, press 'No'. Then the analysis will use Eq. 3 from the article.

Yes

Is  $R_0$  constant throughout the kinetics?

Yes No Cancel

After a  $R_0$  value have been input characterizing the value in the Equilibrium of the final-state, a test of its validity to the final FRET Eff. Will be performed according to:

$$\langle E \rangle = \int_{r_{min}}^{r_{max}} \frac{p(r)}{1 + \left(\frac{r}{R_0}\right)^6}$$

A dialogue box '*Assessment the validity of  $R_0$  to the Final-state FRET value*' will appear. It will ask for a range, (minimal – ' $R_0$ -min', maximal – ' $R_0$  max' and a given interval – ' $R_0$  – interval') of possible  $R_0$  values. Press '*OK*' to proceed with the assessment.

If the input  $R_0$  value, together with the input folded-state distribution parameters, yields a FRET Eff. Which is within 1% error from the values at the end of the FRET Eff. Kinetic trace, the analysis will proceed. On the other hand, if the error is larger than 1%, the program will notify that '*The  $R_0$  value does not fit Final-state FRET Eff.*' Then it will ask '*Would you like the software to find the best Final-state  $R_0$  ?*'

Pressing '*No*' will end the analysis. Pressing '*Yes*' will allow the software to scope over the given range of  $R_0$  values to find the one which yields a FRET Eff. that deviates from the values at the end of the FRET Eff. kinetics in less than 1%.

A dialogue box will show the best value for  $R_0$  ('*The best found value of  $R_0$  in Angstrom*'). If the new value does not deviate too much from the one input by the user (the user decides)press '*OK*'. Pressing '*Cancel*' terminates the analysis.

Then the actual optimization will start...

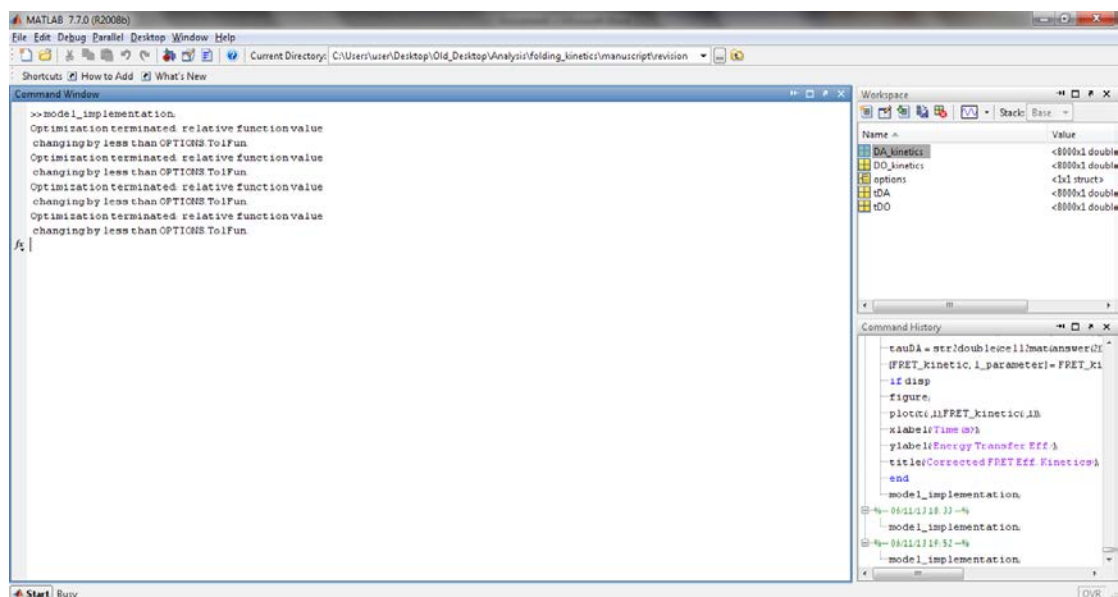

At the end of the optimization process three more figures will appear (if 'display figures' option was chosen in the beginning of the procedure):

1. The resulting '*R0 kinetics*' – the change of  $R_0$  values due to changes in donor fluorescence quantum yields, calculated using the DO kinetic trace (Eq. S5 from the article)

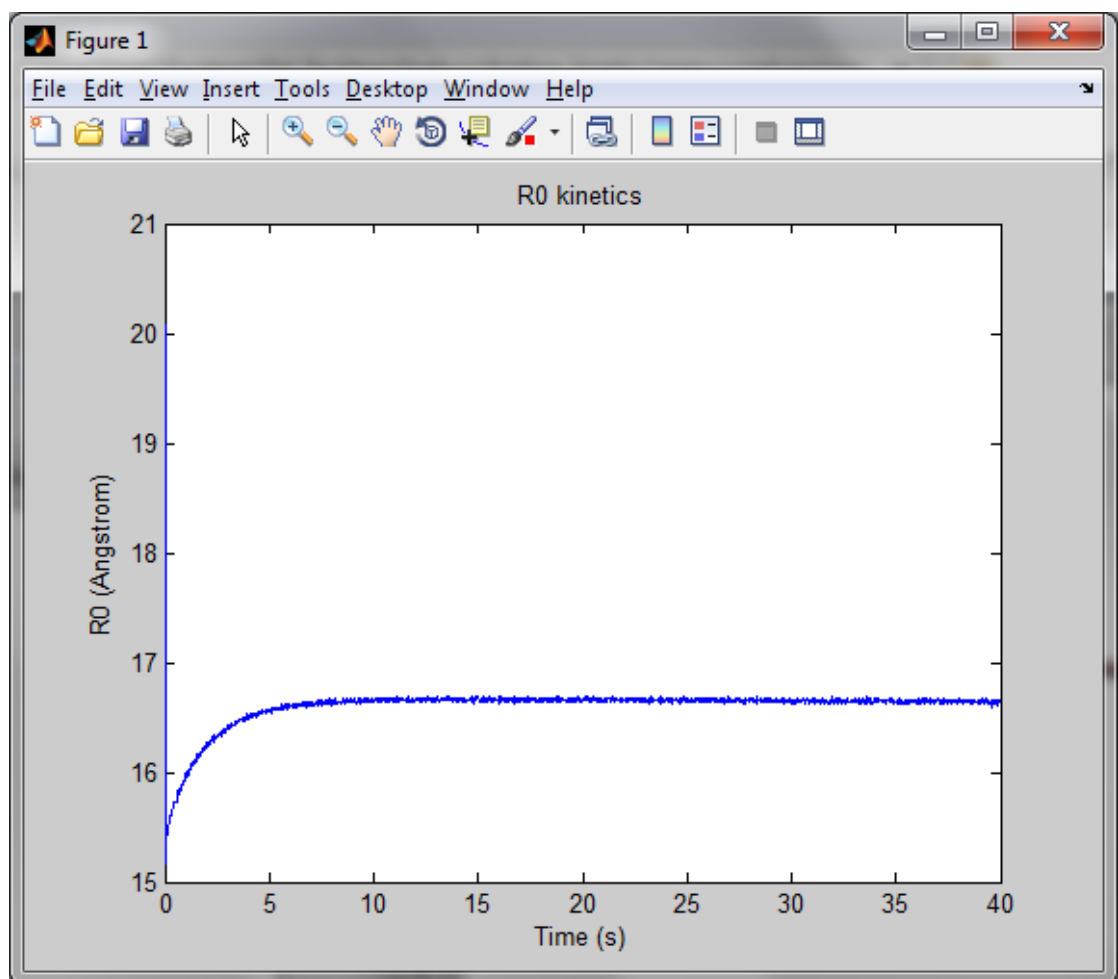

2. Both the known '*Final state*' and the optimized '*Initial state*' distance distributions

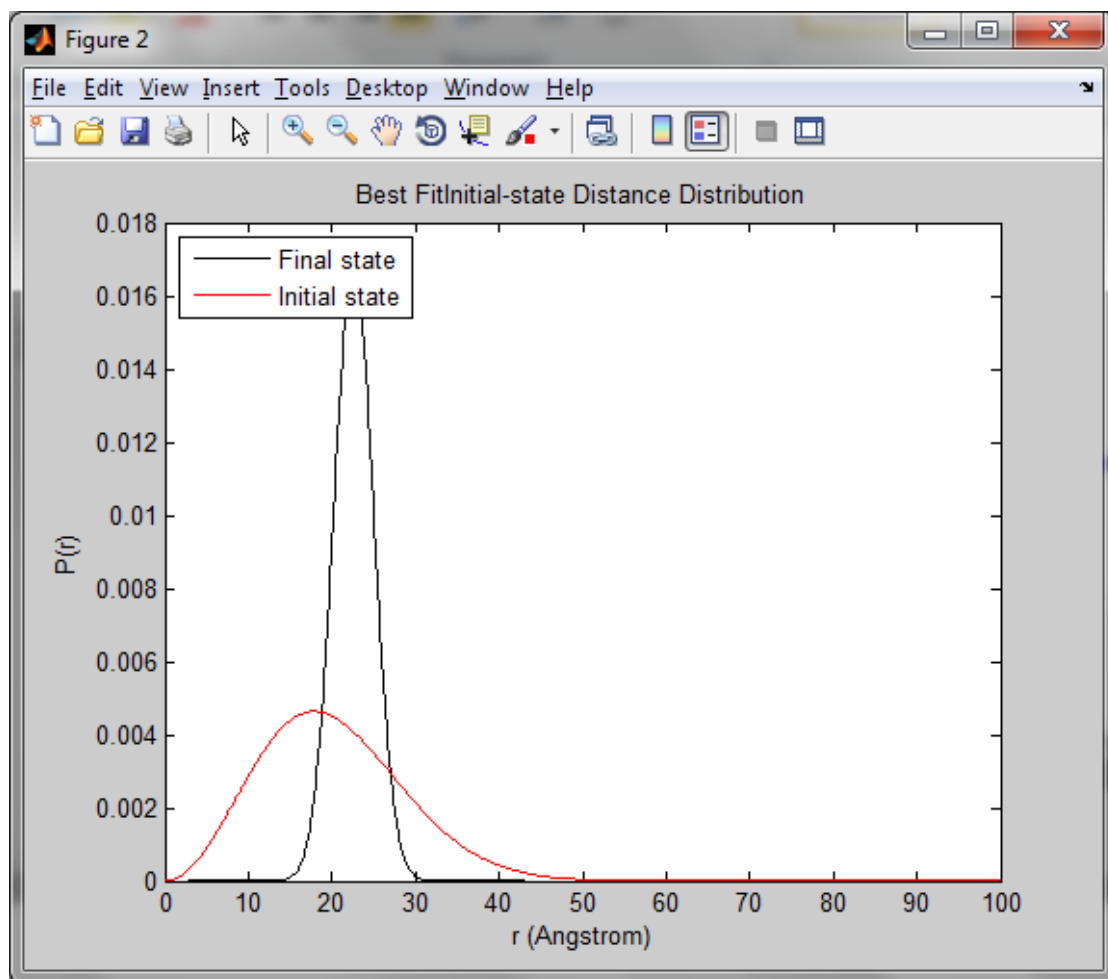

3. 'Best fit results to FRET Eff. Kinetics' – will show the raw (corrected) FRET Eff. kinetic trace ('Raw') and the best fit calculated kinetic trace ('Fit').

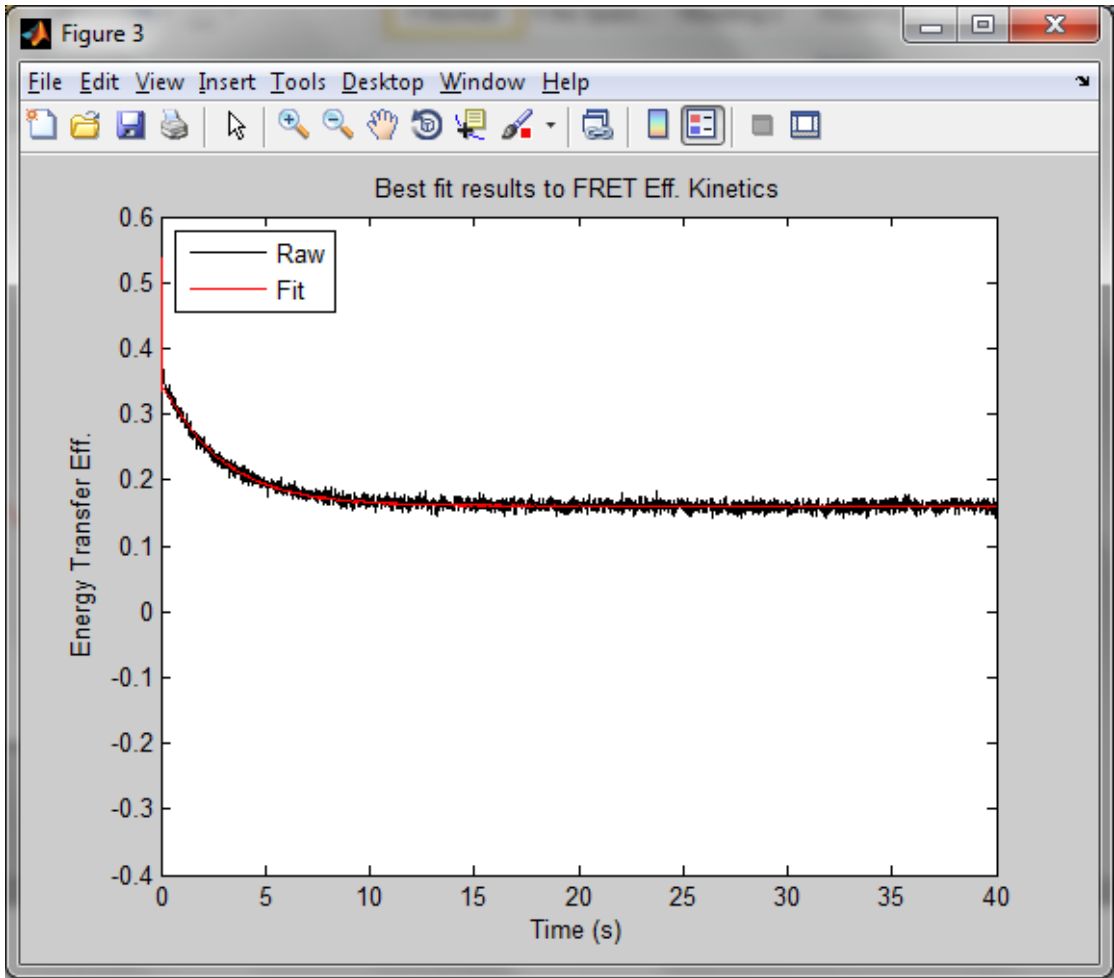

And the best fit results of the parameters will be shown:

1. 'Initial-state Peak (Angstrom)' – The most probable distance of the initial-state
2. 'Initial-state FWHM (Angstrom)' – The width of the distance distribution of the initial-state
3. 'Two-state rate constant (s<sup>-1</sup>)' – The rate constant of the transition from the initial- to the final-state assuming a two-state transition
4. 'Final-state Peak (Angstrom)' - The most probable distance of the final-state, known from Equilibrium trFRET
5. 'Final-state FWHM (Angstrom)' - The width of the distance distribution of the final-state, known from Equilibrium trFRET
6. 'Chi Square' – the value of the fitting  $\chi^2$  value calculated from  $\chi^2 = \frac{\sum_{i=t_{min}}^{t_{max}} ((E)(t)_{Raw} - (E)(t)_{Fit})^2}{DOF}$   $DOF = t_{max} - t_{min} - 3$  where  $t_{min}$  and  $t_{max}$  are given not in time units but rather in units of numbers of cells in the time vector

The user can then copy&paste the values and save all figures. To proceed with the analysis, press 'OK'.

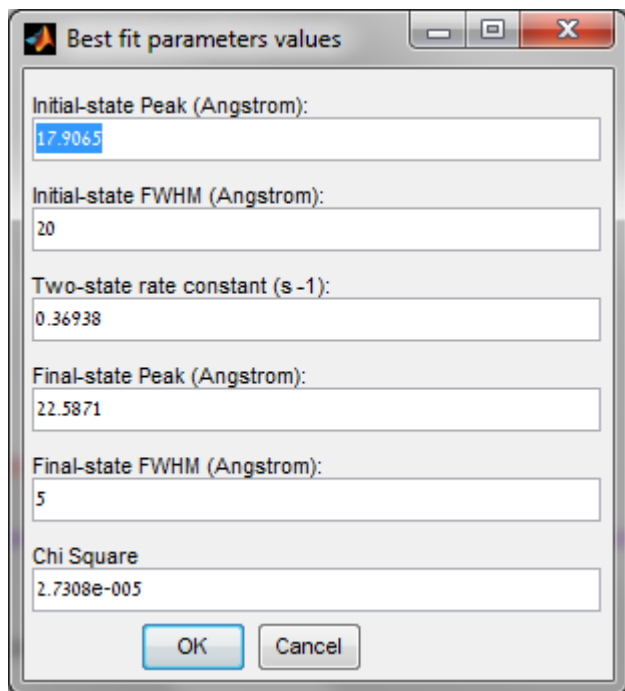

Now, after the optimization has been finished and the best-fit values have been reached, the user can choose to find also the error ranges for the optimized parameters. The user will decide whether to proceed to error analysis judging by the quality of the fit.

Accordingly, a question 'Would you like to perform a rigorous error analysis' will appear.

Pressing 'No' will terminate the analysis procedure. To proceed to error analysis press 'Yes'.

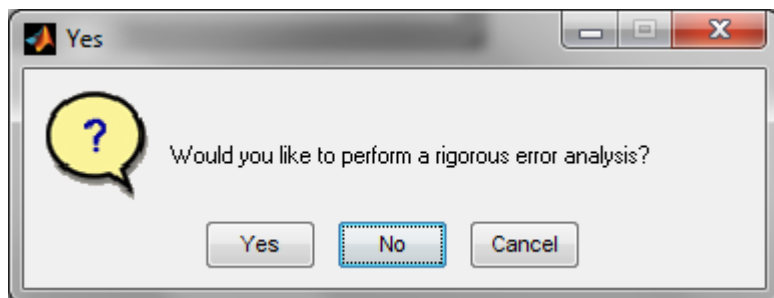

A dialogue box will appear '*Please enter parameter value ranges*'. According to the best fit parameter values, the user will decide upon the value ranges and the increments to be assessed:

1. Initial-state  $a$  parameter:
  - a. '*Initial-state a – min*'
  - b. '*Initial-state a – max*'
  - c. '*Initial-state a – interval*' – the increment between each assessed  $a$  value in the range.
2. Initial-state  $b$  parameter:
  - a. '*Initial-state b – min*'
  - b. '*Initial-state b – max*'
  - c. '*Initial-state b – interval*'
3. The two-state transition Rate Constant  $k$  parameter:
  - a. '*Rate Constant k – min*'
  - b. '*Rate Constant k – max*'
  - c. '*Rate Constant k – interval*'

To proceed with the error analysis, press '*OK*'.

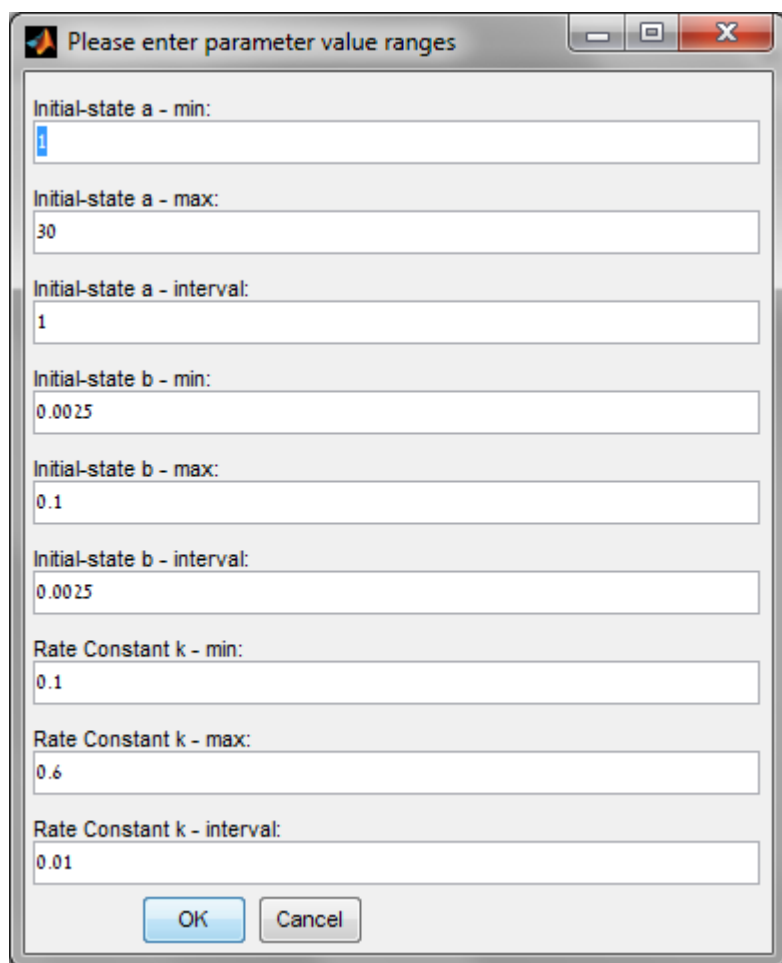

The image shows a Windows-style dialog box titled "Please enter parameter value ranges". It contains several input fields for parameter values and their intervals. The fields are arranged vertically and are as follows:

- Initial-state a - min: 1
- Initial-state a - max: 30
- Initial-state a - interval: 1
- Initial-state b - min: 0.0025
- Initial-state b - max: 0.1
- Initial-state b - interval: 0.0025
- Rate Constant k - min: 0.1
- Rate Constant k - max: 0.6
- Rate Constant k - interval: 0.01

At the bottom of the dialog box, there are two buttons: "OK" and "Cancel".

The error analysis can take a while...

After the error analysis is finished, the resulting minimal and maximal values, that are accepted within 95% confidence will be shown in the dialogue box '*Best fit parameters values*'.



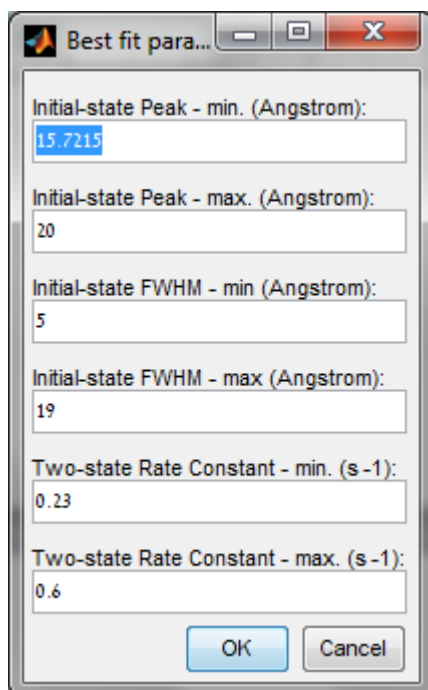

and three scatter plots of the Initial-state Peak, FWHM and two-state Rate Constant acceptable values will be shown.

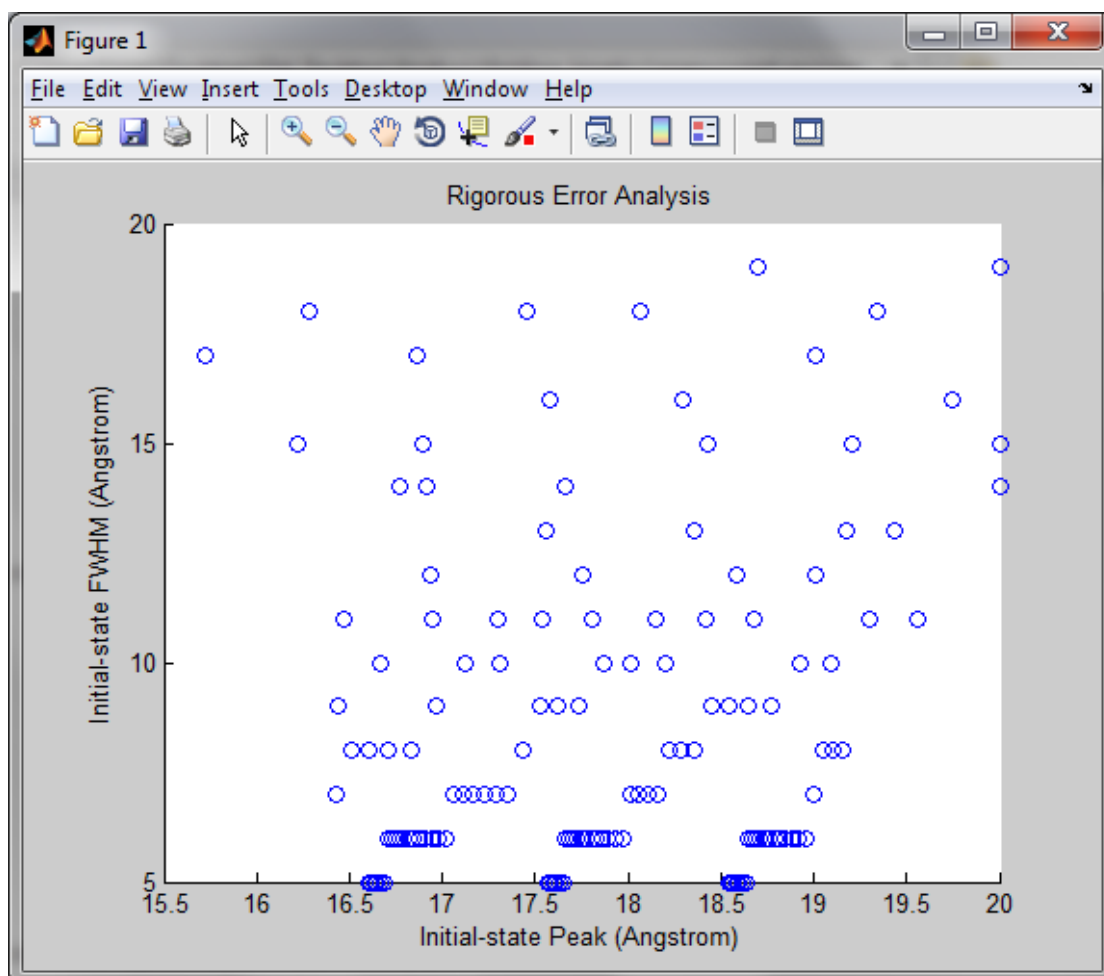

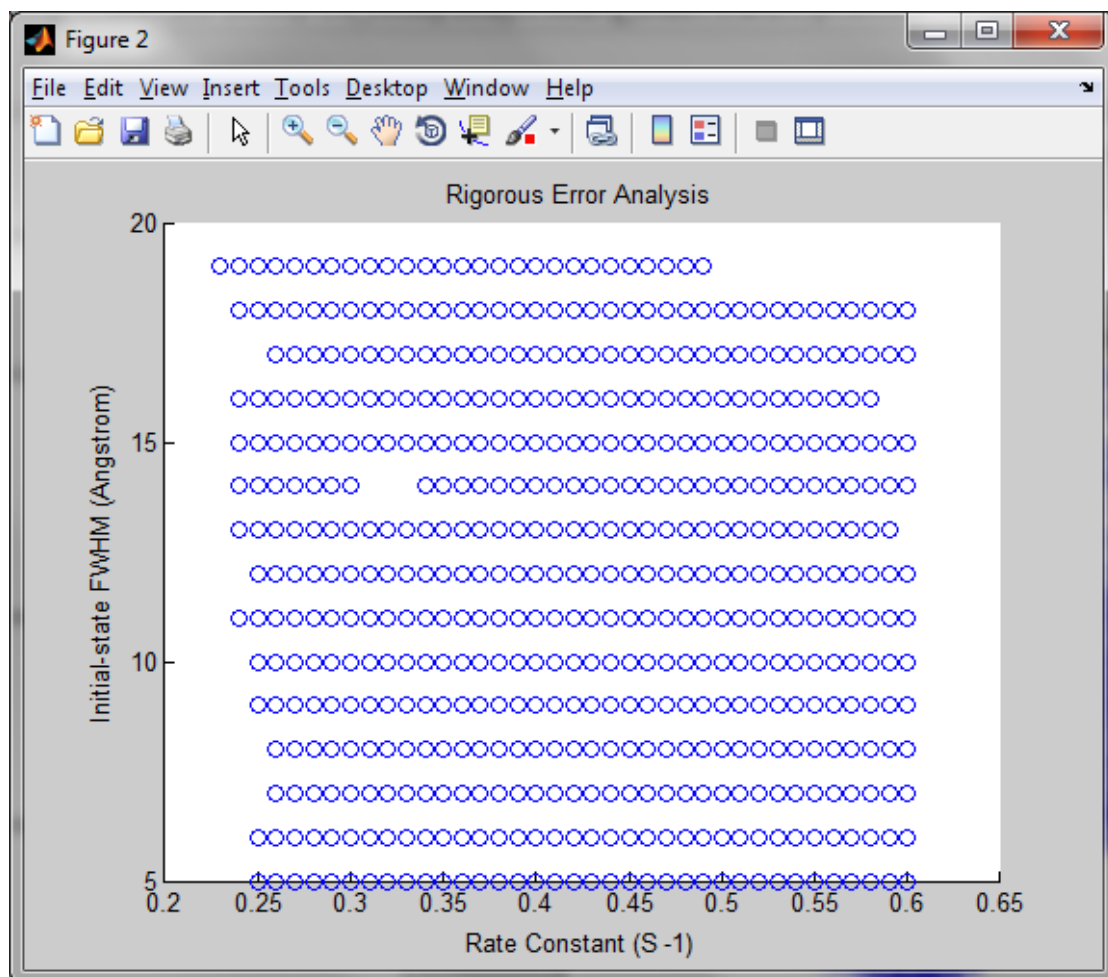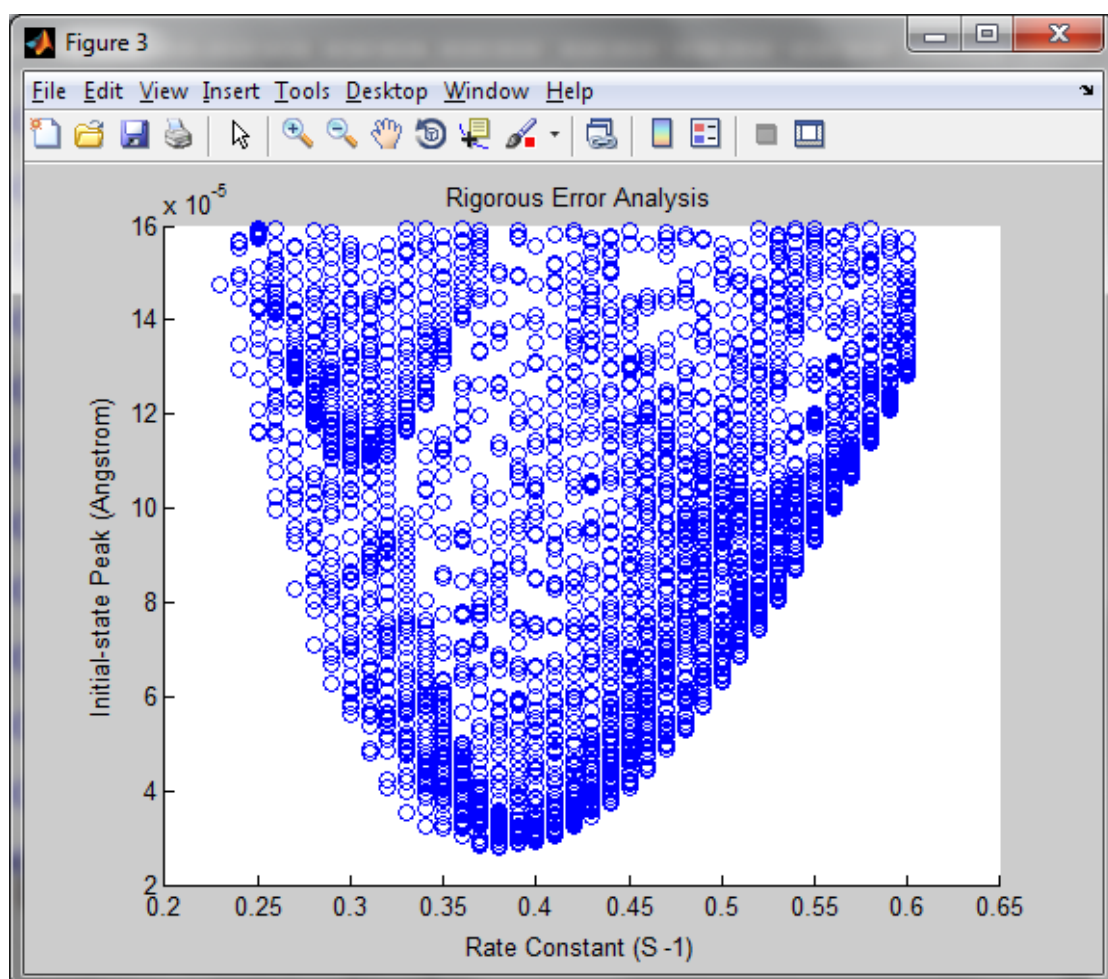

The output variables of this specific example are given in the file '*matlabFinish.mat*'.

**Workspace parameters:**

| <b>Parameter Name</b>   | <b>Description</b>                                                                                                                                                                               |
|-------------------------|--------------------------------------------------------------------------------------------------------------------------------------------------------------------------------------------------|
| <i>tauDO</i>            | The average donor fluorescence lifetime in the absence of acceptor (DO), input by the user                                                                                                       |
| <i>tauDA</i>            | The average donor fluorescence lifetime in the presence of acceptor (DA), input by the user                                                                                                      |
| <i>tDO</i>              | Time vector of DO fluorescence kinetic trace                                                                                                                                                     |
| <i>tDA</i>              | Time vector of DA fluorescence kinetic trace                                                                                                                                                     |
| <i>DO_kinetics</i>      | Intensity vector of DO fluorescence kinetic trace                                                                                                                                                |
| <i>DA_kinetics</i>      | Intensity vector of DA fluorescence kinetic trace                                                                                                                                                |
| <i>t</i>                | Time vector of FRET Eff. kinetic trace                                                                                                                                                           |
| <i>min_time</i>         | The minimal cell number in the time vector to which the model will be fit                                                                                                                        |
| <i>max_time</i>         | The maximal cell number in the time vector to which the model will be fit                                                                                                                        |
| <i>FRET_kinetic</i>     | The corrected experimental FRET Eff. kinetic trace                                                                                                                                               |
| <i>FRET_kinetic_fit</i> | The best fit calculated FRET Eff. kinetic trace                                                                                                                                                  |
| <i>l</i>                | The FRET Eff. correction factor                                                                                                                                                                  |
|                         |                                                                                                                                                                                                  |
| <i>a_start</i>          | An array with parameter initial guesses                                                                                                                                                          |
| <i>a_start(1)</i>       | The initial-state 'a' parameter guess                                                                                                                                                            |
| <i>a_start(2)</i>       | The initial-state 'b' parameter guess                                                                                                                                                            |
| <i>a_start(3)</i>       | The two-state transition rate constant parameter guess ( $s^{-1}$ )                                                                                                                              |
| <i>a_start(4)</i>       | The final-state 'a' parameter known from trFRET in equilibrium                                                                                                                                   |
| <i>a_start(5)</i>       | The final-state 'b' parameter known from trFRET in equilibrium                                                                                                                                   |
| <i>a_start(6)</i>       | (optional): The time-constant $R_0$ value. Is being used if time-constant- $R_0$ analysis is chosen                                                                                              |
| <i>a_min</i>            | An array of parameter lower boundaries.                                                                                                                                                          |
| <i>a_min(1)</i>         | The initial-state 'a' parameter lower boundary                                                                                                                                                   |
| <i>a_min(2)</i>         | The initial-state 'b' parameter lower boundary                                                                                                                                                   |
| <i>a_min(3)</i>         | The two-state transition rate constant parameter lower boundary ( $s^{-1}$ )                                                                                                                     |
| <i>a_min(4)</i>         | The final-state 'a' parameter lower boundary – is equated to $a\_start(4)*0.999$ since this parameter is Const. in the analysis                                                                  |
| <i>a_min(5)</i>         | The final-state 'b' parameter lower boundary – is equated to $a\_start(5)*0.999$ since this parameter is Const. in the analysis                                                                  |
| <i>a_min(6)</i>         | (optional): The time-constant $R_0$ lower boundary. Is being used if time-constant- $R_0$ analysis is chosen. – is equated to $a\_start(6)*0.999$ since this parameter is Const. in the analysis |
| <i>a_max</i>            | An array of parameter upper boundaries.                                                                                                                                                          |
| <i>a_max(1)</i>         | The initial-state 'a' parameter upper boundary                                                                                                                                                   |
| <i>a_max(2)</i>         | The initial-state 'b' parameter upper boundary                                                                                                                                                   |
| <i>a_max(3)</i>         | The two-state transition rate constant parameter upper boundary ( $s^{-1}$ )                                                                                                                     |
| <i>a_max(4)</i>         | The final-state 'a' parameter upper boundary – is equated to $a\_start(4)*1.001$ since this parameter is Const. in the analysis                                                                  |
| <i>a_max(5)</i>         | The final-state 'b' parameter upper boundary – is equated to $a\_start(5)*1.001$ since this parameter is Const. in the analysis                                                                  |
| <i>a_max(6)</i>         | (optional): The time-constant $R_0$ upper boundary. Is being used if time-constant- $R_0$ analysis is chosen. – is equated to $a\_start(6)*1.001$ since this parameter is Const. in the analysis |
| <i>x</i>                | An array with parameter optimized values                                                                                                                                                         |
| <i>x(1)</i>             | The initial-state 'a' parameter optimized value                                                                                                                                                  |
| <i>x(2)</i>             | The initial-state 'b' parameter optimized value                                                                                                                                                  |
| <i>x(3)</i>             | The two-state transition rate constant parameter optimized value ( $s^{-1}$ )                                                                                                                    |
| <i>x(4)</i>             | The final-state 'a' parameter known from trFRET in equilibrium                                                                                                                                   |

|                             |                                                                                                                                                                                                                                                  |
|-----------------------------|--------------------------------------------------------------------------------------------------------------------------------------------------------------------------------------------------------------------------------------------------|
|                             | – Const.                                                                                                                                                                                                                                         |
| $x(5)$                      | The final-state 'b' parameter known from trFRET in equilibrium<br>– Const.                                                                                                                                                                       |
| $x(6)$                      | (optional): The time-constant $R_0$ value. Is being used if time-constant- $R_0$ analysis is chosen – Const.                                                                                                                                     |
| <i>PEAK_F</i>               | Most probable distance of known final-state distance distribution (Å)                                                                                                                                                                            |
| <i>FWHM_F</i>               | Full Width at Half Maximum of known final-state distance distribution (Å)                                                                                                                                                                        |
| <i>PEAK_I</i>               | Most probable distance of optimized initial-state distance distribution (Å)                                                                                                                                                                      |
| <i>FWHM_I</i>               | Full Width at Half Maximum of optimized initial-state distance distribution (Å)                                                                                                                                                                  |
| <i>PEAK_min</i>             | The lower boundary value of the most probable distance of initial-state distance distribution (Å)                                                                                                                                                |
| <i>PEAK_max</i>             | The upper boundary value of the most probable distance of initial-state distance distribution (Å)                                                                                                                                                |
| <i>FWHM_min</i>             | The lower boundary value of the Full Width at Half Maximum of initial-state distance distribution (Å)                                                                                                                                            |
| <i>FWHM_max</i>             | The upper boundary value of the Full Width at Half Maximum of initial-state distance distribution (Å)                                                                                                                                            |
| <i>rigorous</i>             | A value of '1' if the user chooses the perform a rigorous error analysis and a value of '0' if not.                                                                                                                                              |
| <i>rigorous_array</i>       | An array that includes the fitting parameter values which yield a $\chi^2$ value lower or equal to the 95% Confidence limit.                                                                                                                     |
| <i>rigorous_array(:,1)</i>  | Initial-state 'a' parameter                                                                                                                                                                                                                      |
| <i>rigorous_array(:,2)</i>  | Initial-state 'b' parameter                                                                                                                                                                                                                      |
| <i>rigorous_array(:,3)</i>  | Two-state transition Rate Constant ( $s^{-1}$ )                                                                                                                                                                                                  |
| <i>rigorous_array(:,4)</i>  | Initial-state Most probable distance (Å)                                                                                                                                                                                                         |
| <i>rigorous_array(:,5)</i>  | Initial-state Full Width at Half Maximum (Å)                                                                                                                                                                                                     |
| <i>rigorous_array(:,6)</i>  | $\chi^2$ value                                                                                                                                                                                                                                   |
| <i>R</i>                    | Distance vector                                                                                                                                                                                                                                  |
| <i>PF</i>                   | Known final-state distance distribution                                                                                                                                                                                                          |
| <i>PI</i>                   | Optimized initial-state distance distribution                                                                                                                                                                                                    |
| <i>chi2</i>                 | Value of Best fit $\chi^2$ value                                                                                                                                                                                                                 |
| <i>chi2limit_alpha_0_05</i> | 95% Confidence limit for $\chi^2$ values                                                                                                                                                                                                         |
| <i>chi2limit_alpha_0_01</i> | 99% Confidence limit for $\chi^2$ values                                                                                                                                                                                                         |
| <i>chi2limit_alpha_0_1</i>  | 90% Confidence limit for $\chi^2$ values                                                                                                                                                                                                         |
| <i>chi2limit_alpha_0_33</i> | 67% Confidence limit for $\chi^2$ values                                                                                                                                                                                                         |
| <i>R0constant</i>           | A Boolean variable with a value of 1 if time-constant- $R_0$ analysis is chosen and a value of 0 if time-dependent- $R_0$ analysis is chosen                                                                                                     |
| <i>R0_final_equilibrium</i> | The value input by the user of $R_0$ (Å) in the case of a time-dependent- $R_0$ analysis                                                                                                                                                         |
| <i>R0vec</i>                | The vector of $R_0$ values in the case of a time-dependent- $R_0$ analysis                                                                                                                                                                       |
| <i>R0_test</i>              | The value of $R_0$ input by the user                                                                                                                                                                                                             |
| <i>Proposed_R0</i>          | The value of $R_0$ proposed by the script, that best fits the final-state FRET Eff. and distance distribution                                                                                                                                    |
| <i>Find_R0</i>              | A Boolean variable with a value of 1 the $R_0$ value input by the user deviates from the optimized one and the user chooses to let the script find the optimal value of $R_0$ that best fits the final-state FRET Eff. and distance distribution |
| <i>options</i>              | A list of variables important for the optimization procedure. Should always be present in the analysis                                                                                                                                           |
| <i>options.MaxFunEvals</i>  | The maximal number of function evaluations in the optimization. The default value used here is 5000.                                                                                                                                             |
| <i>options.MaxIter</i>      | The maximal number of optimization iterations for each function evaluation step. The default value used here is 5000                                                                                                                             |

|                              |                                                                                                                   |
|------------------------------|-------------------------------------------------------------------------------------------------------------------|
| <i>options.TolFun</i>        | The functional Tolerance value. The default value used here is 1E-25                                              |
| <i>options.TolX</i>          | The iterational Tolerance value. The default value used here is 1E-25                                             |
| <i>options.DiffMinChange</i> | The minimal change that proceeds the optimization procedure to the next step. The default value used here is 1E-5 |

## Supporting References

- Orevi, T., E. Ben Ishay, M. Pirchi, M. H. Jacob, D. Amir, and E. Haas. 2009. Early closure of a long loop in the refolding of adenylate kinase: a possible key role of non-local interactions in the initial folding steps. *J Mol Biol* 385:1230-1242.
- Li, P., F. Y. Oliva, A. N. Naganathan, and V. Munoz. 2009. Dynamics of one-state downhill protein folding. *Proc Natl Acad Sci U S A* 106:103-108.
- Liu, J., L. A. Campos, M. Cerminara, X. Wang, R. Ramanathan, D. S. English, and V. Munoz. 2012. Exploring one-state downhill protein folding in single molecules. *Proc Natl Acad Sci U S A* 109:179-184.
- Oliva, F. Y., and V. Munoz. 2004. A simple thermodynamic test to discriminate between two-state and downhill folding. *J Am Chem Soc* 126:8596-8597.
- Beechem, J. M., and E. Haas. 1989. Simultaneous determination of intramolecular distance distributions and conformational dynamics by global analysis of energy transfer measurements. *Biophys J* 55:1225-1236.
- Haas, E., and I. Z. Steinberg. 1984. Intramolecular dynamics of chain molecules monitored by fluctuations in efficiency of excitation energy transfer. A theoretical study. *Biophys J* 46:429-437.
- Clark, P. L., B. F. Weston, and L. M. Gierasch. 1998. Probing the folding pathway of a beta-clam protein with single-tryptophan constructs. *Fold Des* 3:401-412.
- Hu, K. N., W. M. Yau, and R. Tycko. 2010. Detection of a transient intermediate in a rapid protein folding process by solid-state nuclear magnetic resonance. *J Am Chem Soc* 132:24-25.
- Killick, T. R., S. M. Freund, and A. R. Fersht. 1999. Real-time NMR studies on a transient folding intermediate of barstar. *Protein Sci* 8:1286-1291.
- Oliveberg, M., and A. R. Fersht. 1996. Thermodynamics of transient conformations in the folding pathway of barnase: reorganization of the folding intermediate at low pH. *Biochemistry* 35:2738-2749.
- Teilum, K., K. Maki, B. B. Kragelund, F. M. Poulsen, and H. Roder. 2002. Early kinetic intermediate in the folding of acyl-CoA binding protein detected by fluorescence labeling and ultrarapid mixing. *Proc Natl Acad Sci U S A* 99:9807-9812.
- Andreasson, L. E., R. Branden, and B. Reinhammar. 1976. Kinetic studies of *Rhus vernicifera* laccase. Evidence for multi-electron transfer and an oxygen intermediate in the reoxidation reaction. *Biochim Biophys Acta* 438:370-379.
- Magnusson, O. T., G. H. Reed, and P. A. Frey. 2001. Characterization of an allylic analogue of the 5'-deoxyadenosyl radical: an intermediate in the reaction of lysine 2,3-aminomutase. *Biochemistry* 40:7773-7782.
- Demchenko, A. P., I. Gryczynski, Z. Gryczynski, W. Wiczk, H. Malak, and M. Fishman. 1993. Intramolecular dynamics in the environment of the single tryptophan residue in staphylococcal nuclease. *Biophys Chem* 48:39-48.
- Callis, P. R. 1997. 1La and 1Lb transitions of tryptophan: applications of theory and experimental observations to fluorescence of proteins. *Methods Enzymol* 278:113-150.
- Lakowicz, J. R. 2000. On spectral relaxation in proteins. *Photochem Photobiol* 72:421-437.
- Nilsson, L., and B. Halle. 2005. Molecular origin of time-dependent fluorescence shifts in proteins. *Proc Natl Acad Sci U S A* 102:13867-13872.
